# Supplementary material
Source: PubMed Central journal article supplement (PMC2650136)
Supplement: 0810219106_0810219106SI.pdf [file 0810219106_0810219106SI.pdf]

# Supplementary Information

Pearson et al. 10.1073/pnas.0810219106

## SI Text

**Supporting Text.** DNA enhancer sequence boundaries, mutant site sequence changes, evolutionary sequence alignments of epidermal wound enhancers, oligonucleotide sequences used in preparation of clones and in EMSA assays.

**Reporter Construct Generation.** All reporter constructs were generated by PCR-amplification from genomic or plasmid DNA and cloning either into the TA-cloning vectors pCR-II (Invitrogen) or pGEM-T/pGEM-T Easy (Promega), then cloned into DsRed H-Stinger (1), within the polylinker. All constructs were cloned in the direction that maintains the relative proximal-distal orientation to the HSP70 promoter as found in the native gene; i.e., fragments from 5' of the gene are "forward oriented", whereas intronic fragments are "reverse oriented".

**Construct Boundaries and Site Mutations.** Internal deletions and site mutations were generated by PCR sewing. Deletion sequences indicate bounds of deleted region, mutation sequences show altered nucleotides in red. The number of independent P-element insertion lines that were generated is indicated in parentheses.

**Ddc .47-Based Constructs.** *Ddc* .47 (2) (3 lines): AAAACCCCT-GTTT to AGCGGGCAGCG

*Ddc* Gap1 (2 lines): deleted ACGAGATCGC to ATCAAAT-TAAG

*Ddc* Gap2 (4 lines): deleted AACTAATTTC to AGTTACT-GAT

*Ddc* Gap3 (12 lines): deleted AGCGCCCAAT to GGACT-GCGAT

*Ddc* Gap123 (3 lines): deleted ACGAGATCGC to GGACT-GCGAT

*Ddc* .47 AP1m (8 lines): changed nucleotides CGAGTC-CCCCATAA.TTACTCCCCAGCG

**ple-WE1-Based Constructs.** *ple*-WE1 (9 lines): TTGGTTTGCA to CGAGGGCTGG

*ple*-WE1 APm (7 lines): changed nucleotides GTGTGGTG-GAGCAC.GCACGGCGCTGACA

*ple*-WE1 CREBm (4 lines): changed nucleotides ACGTG-GATCAAAAT.GCACGGCGCTGACA

*ple*-WE1 EXDm (4 lines): changed nucleotides GCACG-GCGCTGACA.AAAATCCCTGCCA

*ple*-WE1GRHm (7 lines): changed nucleotides CACCCGG-GAAAGTTG

*ple*-WE1 HOXm (7 lines): changed to GGAATGGTACTA.CAATACCATACAATGGCCAGCAA. CTCGTCCGGAAC-GCAGATGGTTGCC. CTCTTGGTTGTATTTACCGGTT-GCGTTTGGTTGAACCATGAATGGTATTT

*kkv2* (6 lines): AAGTGCCAGT to GAGTCCTGTG

**kkv-WE1-Based Constructs.** *kkv*-WE1 (4 lines): CAACAAAGGA to TGGGTGTGTT

*kkv*-WE1SubA (9 lines): CAACAAAGGAT to CTCGAAA-GAT

*kkv*-WE1SubB (8 lines): GCTTACTCCG to ATCAAACCGC

*kkv*-WE1 AP1m (3 lines): changed to GGGTGGTGGATG-GC.AAGTGGAGGACTCG.GGAAATCCGCCACAA

*kkv*-WE1 GRHm (1 line): changed to CAACCTTGGGTCG-GC.ATACCTTGGGCTATC.AGACTTTGGGTTTAAAA-ACAGTTCGATCCCCAAGCTTT.TATAGCCAGAGTTG

*msn2* (6 lines): AGCACTGGCC to GTCTCGTGGA

*msn*-WE1 (7 lines): GAGTGTAGCC to ATTGACAGCA

*msn*-WE2 (5 lines): CCACTGCCAAC to ATTGACAGCA

The following sets of primers were used for generating the PCR fragments containing the ORFs for reticulocyte lysate produced *Drosophila* GRH-N protein, *Drosophila* FOS-B, *Drosophila* FOS-D and *Drosophila* JUN.

:GRH, 5'-GCGCTCGAGGCCACCATGTCCACATC-CAC-3' and 5'-CGCAAGCTTCTGATTGGGCAGCTCCGT-3';

DFOS-B, 5'-GCGCTCGAGGCCACCATGACGCTGGA-CAGCTACAA-3' and 5'-TAAAAGCTTTAAGCTGAC-CAGCTTGA-3';

DFOS-D, 5'-GCGCTCGAGGCCACCATGATTGCAC-TAAA-3' and 5'-TAAAAGCTTTAAGCTGACCAGCTT-GGA-3';

DJUN, 5'-GCGCTCGAGGCCACCATGAAAACCCCC-GTTTCCG-3' and 5'-CGCAAGCTTTTGGTCTGTGAGT-TCGGC-3'

**Electrophoretic Mobility Shift Assays.** 500 picomoles of each of two single-stranded oligonucleotides were annealed in a final volume of 100  $\mu$ l in annealing buffer (10 mM Tris-HCl pH7.5, 20 mM NaCl) and labeled with polynucleotide kinase (New England BioLabs,) in the presence of [<sup>32</sup>P]ATP for 30 min at 37 °C. The double-stranded probes were purified by QIAquick Nucleotide Removal Kit (Qiagen). Ten to 20 fmol of radiolabeled DNA probes and 1  $\mu$ l of GRH protein from in vitro transcription/translation reactions were added to a binding buffer containing 25 mM Hepes (pH7.9), 100 mM KCl, 1 mM DTT, 1% polyvinylalcohol, 1% Nonidet P-40, 0.1% BSA, 10% glycerol, 20  $\mu$ g/ml poly(dI-dC) in a volume of 10  $\mu$ l. Proteins were incubated with DNA for 30 min at 4 °C and electrophoresed through 4% native polyacrylamide gel containing 0.5 $\times$  TBE at 4 °C. Gels were dried and autoradiographed with the use of intensifying screens.

To test the DNA binding activity of *Drosophila* JUN and FOS proteins, 10–20 fmol of radiolabeled DNA probes and 1  $\mu$ l of DJUN protein or 1  $\mu$ l of DFOS-D or 1.5  $\mu$ l of DFOS-B protein (equimolar amounts) from in vitro transcription-translation reactions were added to a binding buffer containing 25 mM Hepes (pH7.9), 100 mM KCl, 1 mM MgCl<sub>2</sub>, 1 mM DTT, 0.1% Nonidet P-40, 0.1% BSA, 10% glycerol, 20  $\mu$ g/ml poly(dI-dC) in a volume of 10  $\mu$ l. After incubation at 4 °C for 30 min, the reactions were then resolved by electrophoresis on 5% native polyacrylamide gels containing 0.5 $\times$  TBE at 4 °C. Gels were dried and autoradiographed.

**Oligonucleotide Probes for EMSA Assays.** The following oligonucleotides (IDT) were annealed to their respective complementary sequences, radiolabeled and then used as probes in EMSA assays: *Ddc* wild type GRH site, 5'-CGGACTGCGATTGAAC-CGCTCCTCGGAATTGG-3'; *Ddc* mutant GRH site, 5'-CGGACTGCGATTCCCAAGGTCCTGCGGAATTGG-3'; *ple* wild type GRH site, 5'-GTGATTTCAGACCCCAAAC-GAGTTGATCTTGGAAAG-3'; *ple* mutant GRH site, 5'-GTGATTTCAGACCCCGGAAAGTTGATCTTGGAAAG-3'; *Ddc* wild-type AP1-like site, 5'-TGTTTCGAGTGA-CTCATAATTGGGGGA-3'; *Ddc* mutant AP1-like site, 5'-TGTTTCGAGTCCCCCATAATTGGGGGA-3'.

**Details of the Hapten Labels and Detection Methods for Multiplex in Situ Hybridizations to Wounded Embryos.** Transcripts from the *msn* gene were detected with an RNA probe synthesized from a

full-length *msn* cDNA clone. The *msn* probe was labeled with biotin-UTP, and then detected with HRP-coupled streptavidin followed by a reaction with tyramide-Cy3. Transcripts from the *ple* gene were detected with an RNA probe synthesized from a clone containing exons 5 and 6 from the *ple* locus. The *ple* probe was labeled with FITC-UTP, and then detected with HRP-coupled mouse anti-FITC antibodies followed by a reaction with tyramide-Alexa Fluor 405. Transcripts from the *Ddc* gene were detected with an RNA probe synthesized from a clone containing exon 3 of the *Ddc* locus. The *Ddc* probe was labeled with digoxigenin-UTP, then detected with HRP-coupled sheep anti-digoxigenin antibodies followed by a reaction with tyramide-fluorescein. Transcripts from the *kkv* gene were detected with an RNA probe synthesized from a *kkv* full-length cDNA. The *kkv*

probe was labeled with dinitrophenol-UTP, and then detected with rabbit anti-dinitrophenol antibodies followed by incubation with donkey anti-rabbit antibodies coupled to Alexa Fluor 647 fluorophore (Invitrogen).

***Drosophila* Species Sequence Alignments of the Four Wound Enhancers from the *Ddc*, *ple*, *msn* and *kkv* Genes.** Sequences were cloned by molecular biological techniques or identified by Discontiguous MegaBLAST of NCBI Trace archives, were trimmed to approximate common boundaries and aligned by T-Coffee (2). Alignments were then adjusted based on evolutionary proximity using Lalign ([www.ch.embnet.org/software/LALIGN\\_form.html](http://www.ch.embnet.org/software/LALIGN_form.html)), and hand alignments were done for small sections of poorly aligned sequences.

1. Barolo S, Castro B, Posakony JW (2004) New *Drosophila* transgenic reporters: Insulated P-element vectors expressing fast-maturing RFP. *Biotechniques* 36:436-441.
2. Mace KA, Pearson JC, McGinnis W (2005) An epidermal barrier wound repair pathway in *Drosophila* is mediated by grainy head. *Science* 308:381-385.
3. Notredame C, Higgins DG, Heringa J (2000) *J Mol Biol* 302:205-217.42.

**Table S1. Table of quantitative responses of wound enhancers after wounding**

| Line        | % none | % weak | % moderate | % strong |
|-------------|--------|--------|------------|----------|
| Ddc APm.2   | 100    | 0      | 0          | 0        |
| Ddc APm.3   | 100    | 0      | 0          | 0        |
| Ddc APm.4   | 100    | 0      | 0          | 0        |
| Ddc APm.6   | 100    | 0      | 0          | 0        |
| Ddc APm.9   | 100    | 0      | 0          | 0        |
| ple APm.2   | 100    | 0      | 0          | 0        |
| ple APm.3   | 100    | 0      | 0          | 0        |
| ple APm.4   | 100    | 0      | 0          | 0        |
| ple APm.8   | 100    | 0      | 0          | 0        |
| ple APm.9   | 100    | 0      | 0          | 0        |
| ple GRHm.2  | 95     | 5      | 0          | 0        |
| ple GRHm.3  | 93     | 7      | 0          | 0        |
| ple GRHm.4  | 93     | 7      | 0          | 0        |
| ple GRHm.6  | 57     | 29     | 7          | 7        |
| ple GRHm.8  | 52     | 22     | 22         | 4        |
| ple WE1.1   | 0      | 6      | 27         | 64       |
| ple WE1.4   | 8      | 33     | 51         | 0        |
| Ple CREBm.1 | 11     | 19     | 19         | 52       |
| ple CREBm.2 | 40     | 13     | 13         | 33       |
| Ple CREBm.3 | 10     | 19     | 35         | 35       |
| ple CREBm.4 | 17     | 29     | 29         | 25       |
| ple EXDm.5  | 55     | 6      | 35         | 3        |
| Ple EXDm.2  | 3      | 10     | 62         | 24       |
| Ple EXDm.3  | 8      | 23     | 62         | 8        |
| Ddc 0.47.2  | 0      | 9      | 50         | 41       |
| Ddc 0.47.5  | 11     | 11     | 44         | 33       |

A subset of independent transformant lines were wounded in parallel and allowed to recover as described in *Materials and Methods*, and wound responses were judged in a single blind test as follows: No Fluorescent protein around wound = None; ambiguous response or weak wound-specific response (1–3 cell radius from wound site) = Weak; moderate wound-specific response (more than 3 cell radius from wound site) = Moderate; Substantial wound-specific response (Fluorescent wound responses from entry and exit wounds overlap) = Strong. Only lines with greater than 10 successful wounded embryos were included in quantifications.

## Other Supporting Information Files

[SI Appendix](#)
