# Supplementary material
Source: PubMed Central journal article supplement (PMC2650136)
Supplement: 0810219106_Appendix_PDF.pdf [file 0810219106_Appendix_PDF.pdf]

AP1

```

Dmel 1 ~~~~~a-gaaaaa~ccctgtttcga~~~gtgactcataa~
Dsim 1 ttttttcttctgggagccc~~~~aagaaaaa~ccctgtttcga~~~gtgactcattt~
Dsec 1 ttttttcttctgggagccc~~~~aagaaaaa~ccctgtttcga~~~gtgactcatga~
Dyak 1 att~~~~caaaa~ccctgtttcga~~~gtgactcatga~
Dere 1 ttttttcttctgggagccc~~~~gacaaaaa~ccctgttacga~~~gtgactcatga~
Dpse 1 ~~~~~tt~~~~caaaaaatcgc~tgcccgggtgtgacgtgactcatga~
Dper 1 agctcatgtgg~~~~tg~~~~gattcaaat~cgctgcccgggtgtgacgtgactcatga~
Dana 1 ~~~~~agaaaatc~~~~cctgg~attttgtgactcatga~
Dvir 1 ~~~~at~ctct~tgtcttgectgaggaaa~~~~cccca~cgcagcgc~gtgagtcagag
Dmoj 1 ~~~~atcgc~ctctgt~tagtttgaggaa~~~~ccccatcacaacg~gatgagtcac~ag
Dgri 1 ~~~~~t~~~~ttaggaaa~~~~cccca~tgcaacat~gtgactcataag

```

ETS

-----

ETS

ETS

|--DdcΔ1-->

```

Dmel 29 ~~~tggggga~ttcctgacgagatcgctctcttt~~~~ccacaaattcgagt~~~~t
Dsim 49 ~~~tggggga~ttcctgtcgagattttttt~~~~tttaaatttgagt~~~~t
Dsec 49 ~~~tggggga~ttcctgtcgagatcgctctcttttttttcttttaatttgagt~~~~t
Dyak 30 ~~~tggggga~ttcccgacgagatcgctctctttt~~~~cttaaattcgagt~~~~t
Dere 49 ~~~tggggga~ttcctgacgagatcgctctctttt~~~~cttaaattcgagt~~~~t
Dpse 37 ~~~cggggga~ttcctggaccgcactc~~gcacggtc~cc~cataaaaacg~~~~atacct
Dper 48 ~~~cggggga~ttcctggaccgcactc~~gcacggtc~cc~cataaaaacg~~~~atacct
Dana 29 ~~~tggggga~ttcctgga~ggcacttatgtac~~acacctct~~~~ctctgt~t~~t
Dvir 49 ctcgggggaattcttcttga~~ctg~tcgatcc~~~~a~~~~actga~at~~~~t
Dmoj 49 ~~~tgagggaattgttttattta~~ctg~ttaaaaa~~ac~tgga~ttatacgcaagct
Dgri 35 cgctgggggaattctttt~ttaatgcttcttaaaaatcaacct~aatt~at~~~tatgc~

```

---

```

Dmel 76 ggggaagc~~~~~acgtgagtagaattcaaaatgttttgcttgct
Dsim 91 ggggaagc~~~~~acgtgagcagcattcaaaatgtttgcttggt
Dsec 100 ggggaagc~~~~~acgtgagcagcattcaaaatgttttgcttggt
Dyak 76 gagatgc~~~~~acgtgagcagaattcaaaacattccgctttgt
Dere 95 ggggaagc~~~~~acgtgagcagaattcaaaactgattcactaggt
Dpse 86 gggaa~~~cg~gcg~~~~tggaggatcgtgcgagaattcaaacattctgagagg~
Dper 97 gggaa~~~cg~gcg~~~~tggaggatcgtgcgagaattcaaacattctgagagg~
Dana 74 tggagaacaagatcaggcttcgcgaacgtgagaagaattcttcac~~~~gatcgg~
Dvir 89 ~~~~~agtta~agagctg~~~~g~~~~tt~g~~~~at~t~~att~t~c~~~
Dmoj 99 aattcagctct~tgagctt~~~~gactgaaatatatt~c~tctcatcttgcata~cgcag~
Dgri 87 ~a~t~cgctatag~ccttcaaga~t~tattgt~ttacatttcgtatt~~attgc~ccg~

```

|--DdcΔ2-->

```

Dmel 115 gttttaaatatca~ctaggt~tctcaa~acta~atttc~~aaa~aataa~~~tcaaatta
Dsim 130 gttttaaatataa~ctaggt~tcacac~acta~agctt~~aaa~aataa~~~taaaatta
Dsec 139 gtttaaaatatca~ctaggt~tcacac~acta~agctt~~aaa~aataa~~~taaaatta
Dyak 115 gcttttagtc~aatc~agaaatatca~~a~~t~attttataat~agt~~~~ttaaattt
Dere 134 ggttttggtctttgcgatgt~aa~tatta~taca~tgt~~aaacaagaaatttcaa~~~t
Dpse 135 ~~~~~tctttcaa~~~ttttaaatgggc~~~~t~~~~~ac
Dper 146 ~~~~~tctttcaa~~~ttttaaatgggc~~~~t~~~~~ac
Dana 127 ~~~~~gt~ttt~atggttttaagtttacaattttttttttttac
Dvir 113 ~~~~~tat~~tgcaacttta~tgcgaaaatgaaacgcgcgtgca
Dmoj 149 ~~~~~gtgtaatgcactttg~tgtgaaaatgaca~g~cgtgtgca
Dgri 136 ~~~~~tttaaatgcactcacat~cg~~aatgacg~t~~cg~gcc

```

<--DdcΔ1--|

```

Dmel 165 agttcacagag~ctggcaa~ataaaat~~~~~gtaatagcttgcatgtatgta
Dsim 180 agcttacagag~ctggcaa~ataaaatatattttttaaatgtaatagcttgcatgtat~~
Dsec 189 agcttacagag~ctggcaa~ataaaatatattttttaaatgtaatagcttgcatgtatg~~
Dyak 162 aatcaactttg~ctggcaa~ataaaa~~~~~
Dere 185 atttta~aaatact~ttaatat~agct~~aggettaaatctt~~~~~aag~attcc

```

Dpse 158 ~tatt~~~~~aattaa~~~~~ttatt~~~~~aata~~~~~taa~~~~~ttgta~~~  
Dper 169 ~tatt~~~~~aattaa~~~~~ttatt~~~~~aata~~~~~taa~~~~~ttgta~~~  
Dana 166 atgttttctgatttaagaaatgtatttttaatttaaaaaaacgagtaaaaaaagttaaaaag  
Dvir 150 aaatatcaaacaaca~~~~~ttgc~~~gctt~~~gtcaacaatacaatttaatatatat  
Dmoj 187 aaaaaaaaaaaaaaattatttttttggttt~~~gtagc~a~~~a~aa~gtac~atttaa  
Dgri 169 aaatatcaaacaata~~~~~attgtgtgtcaacagattga~a~ta~aa~~~taa~atttaa

Dmel 211 t~atataatatttttttaaaattctaataaataatccatggaaaataaagcctttgatatcc  
Dsim 234 ~~~~~ttatatattttttt~aattataaataaataatccatggaaaataatgccttcgatatcc  
Dsec 245 t~atataatatttttttaaaattataagtaaatccatggaaaataatgccttcgatatcc  
Dyak 185 ~~~~~tatataattttt~~~~~gtggaaa~~~~~tctccgatatcc  
Dere 230 tgagatgta~ataactggaa~~~~~aaataagcc~~~~~gaaa~~~aatcccgcggatcc  
Dpse 185 ~~~~~t~taatttattgg~~~~~att~~~~~ttat~tggaagaaaaa~~~~~  
Dper 196 ~~~~~t~taatttattgg~~~~~att~~~~~ttat~ggaaagaaaaa~~~~~  
Dana 226 aaaaggatataaattattgttaataatttttaaatagcaagagattattataagactata  
Dvir 199 atatatataaat~~~a~~~cacacac~acctgca~agtgt~ttattt~at~~~tacaataa  
Dmoj 238 at~~~tat~~~at~~~g~~~cacac~cga~~~ggcacact~t~gtattttatagtacaaatta  
Dgri 219 ata~~~aaaaatgcagacacacac~acctggt~a~t~taattattt~at~~~aacaattt

Dmel 270 agt~~~~~  
Dsim 290 agt~~~~~  
Dsec 304 agt~~~~~  
Dyak 216 agt~~~~~  
Dere 278 agt~~~~~  
Dpse 216 ~~~~~gtttccataaaactt~ct~taga~~~~~tctgcca~~~~~  
Dper 226 ~~~~~gtttccataaaactt~ct~taga~~~~~tctgtcca~~~~~  
Dana 286 agtactgtttccttgtagttatctctaaaaactctaactctgtaaggagagattaggatta  
Dvir 248 att~~~~~tccacagtt~~~~~  
Dmoj 284 att~~~~~tattcaatt~~~~~  
Dgri 269 aatgcttctacattctacattcagtt~~~~~

Dmel 272 ~~~~~  
Dsim 292 ~~~~~  
Dsec 306 ~~~~~  
Dyak 218 ~~~~~  
Dere 280 ~~~~~  
Dpse 244 ~~~~~tt~~~~~c~~~~~tagtt~~~~~cgtca~~~~~  
Dper 254 ~~~~~tt~~~~~c~~~~~tagtt~~~~~cgtca~~~~~  
Dana 346 tatgtgtttgaaacatcctatcactccttaggtaaaaatccttctttggtctagcgataag  
Dvir 259 ~~~~~  
Dmoj 295 ~~~~~  
Dgri 294 ~~~~~

Dmel 272 ~~~~~  
Dsim 292 ~~~~~  
Dsec 306 ~~~~~  
Dyak 218 ~~~~~  
Dere 280 ~~~~~  
Dpse 258 g~tag~~~~~c~ttccaaga~acataattcaaga~tc~gagctgtcccagctc~  
Dper 268 g~tag~~~~~c~ttccaaga~acataattcaaga~tc~gagctgtcccagctc~  
Dana 406 gatagaataagattctcatt~ttagctacctaagtcaagactttgaaaaat~ataaatca  
Dvir 259 ~~~~~  
Dmoj 295 ~~~~~  
Dgri 294 ~~~~~

Dmel 272 ~~~~~  
Dsim 292 ~~~~~  
Dsec 306 ~~~~~  
Dyak 218 ~~~~~  
Dere 280 ~~~~~  
Dpse 301 tgaaccattccat~~~~~tcagag~g~~~~~  
Dper 311 tgaaccattcaat~~~~~tcagag~g~~~~~  
Dana 464 t~ttccttcaaaaagaatagatcagagagccagagattggtaaaattatataaaaaag

Dvir 259 ~~~~~  
Dmoj 295 ~~~~~  
Dgri 294 ~~~~~

Dmel 272 ~~~~~  
Dsim 292 ~~~~~  
Dsec 306 ~~~~~  
Dyak 218 ~~~~~  
Dere 280 ~~~~~  
Dpse 320 ~~~~~  
Dper 330 ~~~~~  
Dana 523 ttttggtttttaaaaggctttaattaataaaaaagagaagggcataatttcaaatcaatagg  
Dvir 259 ~~~~~  
Dmoj 295 ~~~~~  
Dgri 294 ~~~~~

Dmel 272 ~~~~~  
Dsim 292 ~~~~~  
Dsec 306 ~~~~~  
Dyak 218 ~~~~~  
Dere 280 ~~~~~  
Dpse 345 cccgagtttaaatgtcctgc~~~~~  
Dper 355 cccgagtttaaatgtcctgc~~~~~  
Dana 583 taattatacataaaaaatattaacaacatgatgtaacaattatctctctttattttattca  
Dvir 259 ~~~~~  
Dmoj 295 ~~~~~  
Dgri 294 ~~~~~

AP1

-----

<--DdcΔ2-- | | --DdcΔ3-->

Dmel 272 ~~~~~tactgattcagcgccca~~attaatgcatg  
Dsim 292 ~~~~~tactgattcagcgctca~~atcaatgcatg  
Dsec 306 ~~~~~tactgattcagcgccca~~attaatgcatg  
Dyak 218 ~~~~~tactgattcagacccca~~atcaatgcatg  
Dere 280 ~~~~~tactgattcagcccga~~attaatgcatg  
Dpse 363 ~~~~~ta~ctgagaca~cgcgca~aattaatgcatg  
Dper 373 ~~~~~ta~ctgagtc~cgcgca~aattaatgcatg  
Dana 643 gataattataataaaaatataatacaaaaagatctgtattag~aagctcaact~ttacttg  
Dvir 259 ~~~~~tcagttcagcga~~~~~t~~gagc  
Dmoj 295 ~~~~~tcagttcagcgt~~~~~tt~tgaga  
Dgri 294 ~~~~~tcagtttagcgaatgggcattgattaga

Dmel 301 ttccaaaaaagt~~gtcaaaaaac~~~~~gtgcacaaa~~~~~  
Dsim 321 ttccaaaaaagt~~gtcaaaaa~~~~~  
Dsec 335 ttgcaaaaaagt~~gtcaaaaaat~~~~~gtgcacaa~~~~~  
Dyak 247 ttccgaaaaagt~~acaaaataaactctccgtgcagaacgtgc~~~~~  
Dere 309 tttcgaaaaagtaaggaacaaa~~ctaaccgtgcagaacgtgc~~~~~  
Dpse 391 ~ttccaaaat~~~~~aaca~accaaaaa~~at~~~~~ca~~~~~c~~~~~c~ag~~  
Dper 401 ~ttccaaaat~~~~~aaca~accaaaaa~~at~~~~~ca~~~~~c~~~~~c~ag~~  
Dana 701 ctttaaaaaatgttttaaagatataaaaaagatattgtttgccaattcagggtgtcgagtc  
Dvir 276 ~~~~cga~~~~~gggtagc~~~~~  
Dmoj 315 tttgcgatt~gaggaagc~~~~~  
Dgri 322 ~ttgcgagtcgagtgtaac~~~~~

Dmel 331 ~~~~~tcaaa~~~~~  
Dsim 340 ~~~~~g~~~~~  
Dsec 364 ~~~~~a~tcaag~~~~~  
Dyak 287 ~~~~~ataag~tcaac~~~~~  
Dere 349 ~~~~~acaaa~tcaaa~~~~~  
Dpse 421 aagagc~g~~~~~c~~~~~aa~~taacaaa~tcaaag~~a~gaatcgcacaca~a  
Dper 431 aagagc~g~~~~~c~~~~~aa~~taacaaa~tcaaag~~a~gaatcgcacaca~a  
Dana 761 actctcagattaattgaacttccaaaaaagtaacaaaatcaccgctaagaa~cgcacaca

Dvir 286 ~~~~~  
Dmoj 332 ~~~~~  
Dgri 340 ~~~~~

Dmel 336 ~~~cgagagctgaatttggtttttacgacagcggctgcgattcgaagttcagcggctgcg  
Dsim 341 ~~~cgagtcagagaatgtggtttttacgacagcagcactgctatttgaagttcagcggctgcg  
Dsec 370 ~~~cgagtgacagaatgtggtttttacgactgaggctgcgattcgaagttcagcggctgcg  
Dyak 297 ~~~cgggtgaggatgtatt~~~~~aaaaatacattctcagtcgcccattgagattga  
Dere 359 ~~~cgggtggagaatgt~~~~~atTTTTacataccgccc  
Dpse 456 aca~~agttgagaatggtgcagtcggagccacggccgagcggct~~~~~  
Dper 466 aca~~agttgagaatggtgcagtcggagccacggccgagcggct~~~~~  
Dana 820 a~atcag~tgaaaatgatccgaaatccgagcaagtgcagaatttatttttaaaaaacagc  
Dvir 286 ~~~~~  
Dmoj 332 ~~~~~  
Dgri 340 ~~~~~

TTK

GRH

<--DdcΔ3-- |

Dmel 394 act~~~~gcat~~~~~tgaaccggctcctgc~~~~~  
Dsim 399 act~~~~gagat~~~~~tgaaccggctcctgc~~~~~  
Dsec 428 act~~~~gagat~~~~~tgaaccggctcctgc~~~~~  
Dyak 349 aat~~~~tgagat~~~~~tgaaccggctcctgc~~~~~  
Dere 391 actgagatgagat~~~~~tgaaccggctcctgc~~~~~  
Dpse 498 ~~~~~tgaaccggctcctgcttgggcccgtaccctgcccgatg~~  
Dper 508 ~~~~~tgaaccggctcctgcttgggcccgtaccctgcccgatg~~  
Dana 878 caaaaccgaagttcagcgggtcgaaccggctcctgc~~~~~  
Dvir 286 ~~~~~aggtgaaccggctcctgaggctgct~~~~~ctcg  
Dmoj 332 ~~~~~gagtgaccggctcctgaggctgca~~~~~ctcg  
Dgri 340 ~~~~~aggtgaaccggctcctgaggctactctgagagctcggagctcg

Dmel 415 ~~~~~ggaattggcagcgcctgctggacgg~~~~~  
Dsim 420 ~~~~~ggaattggcagcgcctgctgggagg~~~~~  
Dsec 449 ~~~~~ggaataggcagcgcctgctgggagg~~~~~  
Dyak 371 ~~~~~ggaattggcagcgcctgctgggagg~~~~~  
Dere 417 ~~~~~ggaattggcagcgcctgctgggagg~~~~~  
Dpse 535 ~~~~~cgggtggctgtgggct~gctgctgg~~~~~  
Dper 545 ~~~~~cgggtggctgtgggct~gctgctgg~~~~~  
Dana 912 ~~~~~gaaatgccga~~~~~  
Dvir 315 aagctc~~~~~gctgctc~g~~cagc~acgcagctccaa~cgaggcgc~~~~~  
Dmoj 361 cagctc~~~~~acaaagct~cacag~~~agcaggcggagcgaatcgaggcgcag~gcg  
Dgri 383 gagctcgcacgactcacagct~cactgctca~ccactcgcagc~tctc~a~tctggtgcg

TATAAAA

Dmel 439 ~~~gctttaaaagccatggccaagagcgggcagcgc  
Dsim 444 ~~~gctttaaaagccatggccaagagcgggcagcgc  
Dsec 473 ~~~gctttaaaagccatggccaagagcgggcagcgc  
Dyak 395 ~~~gctttaaaagccatggccaagagcgcagcgc  
Dere 441 ~~~gctttaaaagccatggccaacagcgcagcgc  
Dpse 558 ~~~gctttaaaagccttggccaagtgcgagcagcgc  
Dper 568 ~~~gctttaaaagccttggccaagtgcgagcagcgc  
Dana 922 ~~~gctttaaaagccttggccaagagcgcagcgc  
Dvir 352 ~tgctttaaaagcgcgcccgaaagtgcgaccagcactcagttggctaac  
Dmoj 409 atgctttaaaaggtcttgccgaacgacgagcagcac~~~~~  
Dgri 438 atgctttaaaagcttggccgagcgcagcagcagcactcagttggctaac

ple-WE1

CREB

Dmel 1 ggttt~~~~gcgacacgtg~acgtaaaata~~~aactgaaaaa~~~caaac~~~~~  
Dsim 1 ggttt~~~~gccgcacgtg~acgcaaaata~~~aactgaaaaa~~~caaac~~~~~  
Dsec 1 gcttt~~~~gccgcacgtg~acgcaaaata~~~aactgaaaaa~~~caaac~~~~~  
Dere 1 ggttt~~~~gccgcacgtg~acgcaaaata~~~aactgaaaaa~~~caaactgaaagaaa  
Dyak 1 ggttt~~~~gctcgacgtg~acgcaaaata~~~aactgaaaaa~~~caaaccga~~~~~  
Dpse 1 tgttt~~~~gtcgacgtggacgcaaaatc~~~aagagaaaagg~gaaaatcaaan~~~~~  
Dana 1 ggttt~~~~ggcgcacgtg~acgtaaaatcga~~~~~caaac~~~~~  
Dvir 1 tgatt~~~~gcggcacgtg~acgtaaaacca~aaacaaaattcacaagccc~~~~~  
DMoj 1 cgggaacggacgcacggggacgcaaaaggcgcaaac~aaaaaaaa~tcac~~~~~  
Dgri 1 tgagaa~tcac~~~cacgtg~acgcaaaatca~aac~aaaaaatcaccaccaacgatgt

Dmel 40 ~~~~~agaaaaaacaaacaaaaaatg~~~tccaaaacc~~~aaaaca~a  
Dsim 40 ~~~~~aaaaaactgg~cataaaaca~~~~~aacc~~~aaaaca~a  
Dsec 40 ~~~~~aaaaaactgg~cataaaaca~~~~~aaca~a  
Dere 50 ctaaaaaaaaaaac~aaacaaaaaatgg~cataaaaca~~~~~aacc~~~aaaaca~a  
Dyak 44 ~~~~~aaaaaaggcaaacaaaaaatgg~cataaaaca~~~~~aacc~~~aaaaca~a  
Dpse 48 ~~~~~nnnnngggcaaaatgtag~~~tag~~~ataaaaaa~~~~~ccataaccagaaaacaaa  
Dana 32 ~~~~~aaaaaatcata~~~~~agtgg~~~~~aataagccaatctaaacc~aa~aaca~a  
Dvir 46 ~~~~~aaaagacaaatcaaaaaa~~~~~caaaaaagaaaaga  
DMoj 49 ~~~~~agg~~~~~agtaaag~~~~~aaacccaaaaact~~~  
Dgri 54 ~~~~~ccaaaggc~~~aaatcaaaata~~~ataaa~~~~~cacaacaaa

Dmel 78 aca~~~~aaat~~~acgaaa~~~~~tgcgaa~~~cgag~~~~~gcgcgcggtatatt  
Dsim 71 aca~~~~aaat~~~acgaaa~~~~~tgcgaa~~~cgag~~~~~gcgcgcggtatatt  
Dsec 66 aca~~~~aaat~~~acgaaa~~~~~tgcgaa~~~cgag~~~~~gcgcgcggtatatt  
Dere 96 aca~~~~aaat~~~acgaaaatcgaatgcgaa~~~cgag~~~~~gcgcgcggtatatt  
Dyak 87 aca~~~~aaat~~~acgaaa~~~~~tgcgaa~~~cgag~~~~~gcgcgcggtatatt  
Dpse 95 cca~~~~aaat~~~gcgaac~~~~~gagacgcgaggcgcgaggcgcaccgcgcggtatatt  
Dana 74 acacgaaaaacaaaacgaaa~~~~~tgcgaa~~~cgagg~~~~~cgcgcggtatatt  
Dvir 79 aaa~~~~aaaa~~~ac~aaa~~~~~gttgag~~~cgcggt~~~~~cgcggggtatatt  
DMoj 72 ~~~~~caaaacaaa~~~~~gccagg~cggtgtgc~~~~~gtgtttgctatatt  
Dgri 89 at~~~~~aaa~~~aacaaaa~~~~~aaacaga~aagcgt~~~~~gcgcggtgctatatt

Dmel 115 tgcataattcaac~~~aa~~~~~ttttacggctaaatgcgggca~~~~~  
Dsim 108 tgcataattcaac~~~aa~~~~~ttttactgctaaatgcgggca~~~~~  
Dsec 103 tgcataattcaac~~~aa~~~~~ttttactgctaaatgcgggcc~~~~~  
Dere 141 agcataattcatttgaa~~~~~ttttactgataaatgcgggca~~~~~  
Dyak 124 tgcataattcaaatgaa~~~~~ca~~~~~ttttactgataaacgcgggca~~~~~  
Dpse 144 tgcataattcaaatgaa~~~~~caatttttattgctaaatgcgagagatacagag  
Dana 118 tgcataattcaaatgaa~~~~~caa~ttttactgctaaatgcgggcgata~~~~~  
Dvir 116 tgcataattcaaatgaa~~~~~atcaatt~~~gacggctaaatgcgagac~~~~~  
DMoj 109 ggcataattcaaatcaaatccaatcaaatcaatttgtat~~~ccaaatgcaaac~~~~~  
Dgri 128 tgcataattcaataaaa~~~~~aacgattt~~~gttggttaa~~~~~

Dmel 149 ~~~~~ataaaa~~~~~acacagcatc~~~~~agtttag  
Dsim 142 ~~~~~ataaaa~~~~~acacagcatc~~~~~agtttag  
Dsec 137 ~~~~~atat~~~~~aaacagcatc~~~~~atgtggttagattca~  
Dere 177 ~~~~~ataaaa~~~~~acacagcatc~~~~~aggcag  
Dyak 162 ~~~~~ataaaaaacacacacagcatc~~~~~aggcag  
Dpse 192 atgtacggagagatacagatacagatacagatacagttgcagataaccagcccagctatag  
Dana 160 ~~~~~aaaag  
Dvir 156 ~~~~~aaaaca~~~~~aagctaa  
DMoj 159 ~~~~~aaaacaaa~~~~~gctaa  
Dgri 160 ~~~~~

AP1

GRH

Dmel 172 ccgg~cgtcatctttggccca~aag~tgtgattcagcacc~aaacgagtt~  
Dsim 165 ccgg~cgtcatctttggccca~aag~tgtgattcagc~ccc~aaacgagtt~  
Dsec 165 ~cgg~cgtcatctttggccca~aag~tgtgattcagc~ccc~aaacgagtt~  
Dere 200 ccgg~cgtcatctttggccca~cag~agtgaatcaga~ccc~aaacgagtt~  
Dyak 189 ccgg~cgtcatctttggcccc~cag~tgtgaatcagc~ccc~aaacgagtt~  
Dpse 252 ccgg~cgtcatctttggcccc~cag~tgtgaatcagc~cat~aaacgagttc

Dana 166 ccgg~cgtcatctttgg~cca~~~~~gtgaatcagc~cgcg~~~~~aaacgagtt~  
Dvir 170 acgg~cgtcatctttgggcca~~~~~gtgaatcaac~cgc~a~~~~~aatccagttc  
DMoj 173 atgaacgtcaggctcgggcca~~~~~gtgaatcagagccc~atgaacgaaatccagttc  
Dgri 161 acag~cgtcatccgctgacca~~~~~gtgaatcagctctcga~~~~~aatccagttc

Dmel 219 gat~~~~cttggga~aagcggag~~~~~gagcggag~at~~~~~  
Dsim 211 gat~~~~cttaga~aagcggag~~~~~gagcggag~at~~~~~  
Dsec 213 gat~~~~cttaga~aagcggag~~~~~agaggggag~at~~~~~  
Dere 246 gat~~~~cttaga~aagcggag~~~~~gagcggag~at~~~~~  
Dyak 235 gat~~~~cttaga~aagcggag~~~~~gagcggag~at~~~~~  
Dpse 298 gatatgacttaga~aagcggcca~~~~~tccgcccgggagggggcagcgcggggacggtag  
Dana 208 gat~~~~cttaga~aagcgg~cgtcaggtggaga~gtggtgtcaagacccacccacctc  
Dvir 214 gat~~~~~aagctcta~~~~~attggtatt~ggaga~~~~~  
DMoj 226 gat~~~~~aagcacta~~~~~attgg~attggagagtgg~~~~~  
Dgri 207 gat~~~~~gataagcacta~~~~~attgatgt~~~~~gaga~t~~~~~

AP1/CREB/EXD

Dmel 245 ~tcccccgaca~gcatcttcg~g~~~~~tttcca~ca~~~~~gcacgtgattgaca  
Dsim 237 ~tccccgcgg~gcatcttcg~g~~~~~tttcca~ca~~~~~gcacgtgattgata  
Dsec 240 ~tccccgcggcagcgcgcatcttcg~g~~~~~tttcca~ca~~~~~gcccgtgattgata  
Dere 272 ~ccccgcct~ccgaacttcg~g~~~~~tctcca~ca~~~~~gcacgtgattgaca  
Dyak 261 ~ccccgcct~ccgaacttcg~g~~~~~tttcca~ca~~~~~gcacgtgattgaca  
Dpse 353 agacga~cgcgt~~~~~cgtccag~~~~~tctctaa~~~~~gtg~gcacgtgattgata  
Dana 261 ccc~~~~~accgcttcccagaccctgatccaatcacgtg~ccacgtgattgata  
Dvir 238 ~~~~~~gtgga~~~~~gcatgggattgata  
DMoj 253 ~~~~~~tgggcatatcgaattatgata  
Dgri 233 ~~~~~~agcatttgtgagattgtctgggtttattgata

Dmel 289 tatcatcgtcaagtggg~g~~~~~aag~~~~~tggactcccccttt~~~~~  
Dsim 281 tattatcgccaagtggg~g~~~~~atg~~~~~tggactcccccttt~~~~~  
Dsec 285 tattatcgccaagtggg~g~~~~~aat~~~~~tggactcccccttt~~~~~  
Dere 314 tatcatcgccaagtga~~~~~tggactcccccttt~~~~~  
Dyak 303 tatcatcgccaagtggggaaggtggcagctggatg~~~~~tggactccccctttgg~  
Dpse 395 catcagcgtgttgtgtgga~~~~~tggag~~~~~tggagtccccgcg~~~~~  
Dana 309 catcatcgcaaattggg~g~~~~~act~ccccctcggaatc  
Dvir 258 tatca~~~~~aatcccccccatc~~~~~  
DMoj 275 tgtc~~~~~catttagcattctgatcgac~~~~~  
Dgri 266 tgtgagttggg~g~~~~~tttccatacaacacaccacgcccc~~~~~

Hox

Dmel 324 ~~~~~~cgacagctcat~cgccgtgga~~~~~ataata~~~~~ct  
Dsim 316 ~~~~~~cgacagctcat~cgccgtgga~~~~~ataata~~~~~ct  
Dsec 320 ~~~~~~cgacacctcat~cgccgtgga~~~~~ataata~~~~~ct  
Dere 343 ~~~~~~cgacagctcat~cg~aatgga~~~~~atagca~~~~~ct  
Dyak 352 ~~~~~~cgacagctcat~cgccatgga~~~~~ataaca~~~~~cc  
Dpse 433 ~~~~~~atcgcaactctgacagctcat~ccacatgga~cactccgctccgggtgtggct  
Dana 344 tgaacgta~ccgatcccgccagctcaggccccctggc~~~~~cagctc~~~~~atcgatct  
Dvir 278 ~~~~~~atattgacgggctctga~~~~~cagcg  
DMoj 298 ~~~~~~tgacggagcggactgattgactgattgaa~~~~~  
Dgri 302 ~~~~~~acccaacctccagttgga~~~~~cagttaac~

Dmel 353 agccga~~~~~cttcgatttgggaaagcaaaacctc~  
Dsim 345 agccga~~~~~cttcgatttgggaaagcaaaacctc~  
Dsec 349 agtggga~~~~~cttcgatttgggaaagcaaaacctc~  
Dere 371 agccga~~~~~tcgacttcgatttgggaaagcaaaacgtc~  
Dyak 381 agccga~~~~~tgcctccaacgacttcgatttgggaaagcaaaacctc~  
Dpse 483 ~ccgattgtggctcctattgtggctccgat~tggggcatttgggaaagcaaaacctc~  
Dana 395 ggccgg~~~~~cttcgatttgggaaagcaaaacctc~  
Dvir 301 cacagctgaaactt~~~~~gtggcgatttgggaaagcaaaacctc~  
DMoj 326 ~~~~~~tgtattttgcaatttgggaaagcaaatcctcg~  
Dgri 330 ag~~~~~ggactgtgaattgggaaagcaaaacctcgg

|      |     | Hox                                                             | Hox                        | EXD  | Hox   |
|------|-----|-----------------------------------------------------------------|----------------------------|------|-------|
|      |     | ----                                                            | -----                      | ---- | ----- |
| Dmel | 383 | ~~~aatattatacaataaattagcaacaa~~~~~                              | aaatgattgcccac~tcgtaattaa  |      |       |
| Dsim | 375 | ~~~aatattatacaataaattagcaacaa~~~~~                              | aaatgattgcccattgtggtaattaa |      |       |
| Dsec | 379 | ~~~aatattatacaataaattagcaacaa~~~~~                              | aaatgattgcccatttcgtaattaa  |      |       |
| Dere | 405 | ~~~aatattatacaataaattagcaagaa~~~~~                              | aaatgattggccatttcgtaattaa  |      |       |
| Dyak | 423 | ~~~aatattatacaataaattagctacaa~~~~~                              | aaatgattgcccatttcgtaattaa  |      |       |
| Dpse | 538 | ~~~aatattatacaataaattagcaacaa~~~~~                              | aaacgattgcccatttgtaattaa   |      |       |
| Dana | 425 | ~~~aatattatacaataaattagcagcaa~~~~~                              | aaatgattgcccatttgtaattaa   |      |       |
| Dvir | 340 | ~~~gatattatacaataaattagcaacaa~~~~~                              | aaatgattgcccatttgtaattaa   |      |       |
| DMoj | 359 | atataatattatacaataaattagcaacga~~~~~                             | aaatgattgccaagttgtaattaa   |      |       |
| Dgri | 362 | ttcgatattatacaataaattagcaaaaaataaaaaacgaatgattgcccattttgtaattaa |                            |      |       |

|      |     | Hox                                                          |
|------|-----|--------------------------------------------------------------|
|      |     | ----                                                         |
| Dmel | 432 | tgcacataattg~~~~~ccgcgccagattgctgcccgtagaatgtagctcg          |
| Dsim | 425 | tgcacataattg~~~~~ccgcgccagattgctgcccgtagaatgtagctcg          |
| Dsec | 428 | tgcacataattg~~~~~ccgcgccagatagctggcgtaaaatg~~~~~             |
| Dere | 454 | tgcacataattg~~~~~ccgcgccagattgctgcccgtagaacgtacatat          |
| Dyak | 472 | tgcacataattg~~~~~ccgcgccagattgctgcccgtagaatgtagctcg          |
| Dpse | 587 | tgcacataattg~~~~~cc~cg~tagattgggtgtagtagcagtag~~~~~          |
| Dana | 474 | tgcacataattg~~~~~ctgggccagattgggtgcccgtagaatgtagctcg         |
| Dvir | 389 | tgcacataattg~~~~~ttagccagatcga~~~~~ttagaatagtattt            |
| DMoj | 411 | tgcacataattgtagaattggtgaattgtgagccagatcga~~~~~ttagaacga~~~~~ |
| Dgri | 422 | tgcacataattg~~~~~tgagccagatcga~~~~~ttagaata~~~~~             |

|      |     |                                                           |
|------|-----|-----------------------------------------------------------|
| Dmel | 477 | ctagaatg~~~~~gagtaaaaaatacaaaaaaaaaaaaaaaaaaaaaa          |
| Dsim | 470 | ctagaatg~~~~~gagtaaaaaatac~~~~~aacaacaaaaaa~taaa          |
| Dsec | 465 | ~~~~~gagtaaaaaatac~~~~~gaaaaaaaa~taaa                     |
| Dere | 499 | tcattatcgcttagattgtcgggta~~~~~cctaccct~gtacggcaaaaaacaaaa |
| Dyak | 517 | ctagagtgaggataa~~~~~ctaaca~~~~~aatgaacaaaaa~~~~~a         |
| Dpse | 624 | ~~~~~aatggaaaaaaaaa~~~~~                                  |
| Dana | 519 | at~~~~~agaatggaaaaaaaaataaaaaataaaaaa~~~~~tac             |
| Dvir | 429 | gtagtagt~~~~~agtagtagcagctgtaattgggaaaaaaaaa~~~~~         |
| DMoj | 460 | ~~~~~ctcgctatgtaattggcaaaaaa~~~~~                         |
| Dgri | 455 | ~~~~~aaaataactagttaagtaattgggaaaaaaaaa~~~~~               |

|      |     | Hox                                                            | Hox  |
|------|-----|----------------------------------------------------------------|------|
|      |     | ----                                                           | ---- |
| Dmel | 520 | taaaaacag~~~~~aattgagaatttttgaaatggactcttaattgtatttatta        |      |
| Dsim | 507 | taaaaacag~~~~~aattgagaatttttgaaatggactcttaattgtatttatta        |      |
| Dsec | 492 | taaaaacag~~~~~aattgataatttttgaaatggactcttaattgtatttatta        |      |
| Dere | 550 | aaaaaacag~~~~~aattgagaatttttgaaatggactcttaattgtatttatta        |      |
| Dyak | 550 | aaaaaacag~~~~~aattgagaatttttgaaatggactcttaattgtatttatta        |      |
| Dpse | 637 | ~~~~~tataaaaaatgagaatttttgaaatggattcgtattgta~ttatta            |      |
| Dana | 550 | aaaaagcagcaaaaattataaaaaatgagaatttttgaaatggattcgtattgta~ttatta |      |
| Dvir | 463 | ~~~~~tgtttataaaaaatg~~~~~tttttcaaatggatttttaattgta~ttatta      |      |
| DMoj | 482 | ~~~~~ttgtaaaaaatg~~~~~tttttataaaatcgtttttaattgta~ttatta        |      |
| Dgri | 483 | ~~~~~ttataaaaaatg~~~~~ttttataaaatggatttttaattgta~ttatta        |      |

|      |     | Hox                                                          | Hox  | Hox  |
|------|-----|--------------------------------------------------------------|------|------|
|      |     | ----                                                         | ---- | ---- |
| Dmel | 570 | attgcgcttaattgaattatgaataaatatattttgct~~~~~                  |      |      |
| Dsim | 557 | attgcgcttaattgaattatgaataaatatattttgct~~~~~                  |      |      |
| Dsec | 542 | attgcgcttaattgaattatgaataaatatattttgccc~~~~~                 |      |      |
| Dere | 600 | attgcgcttaattgaattatgaataaatatattttacctgc~~~~~               |      |      |
| Dyak | 600 | attgcgcttaattgaattatgaataaatatattttgctg~~~~~                 |      |      |
| Dpse | 683 | attgcacttaattgaattatgaataaatatatttaatttgattcat~~~~~          |      |      |
| Dana | 609 | attgcgcttaattgaattatgaataaatatattta~gtggccgcct~~~~~          |      |      |
| Dvir | 509 | attgcacctattcaattatgaattatatttgatt~~~~~catacaaaagcattgcca    |      |      |
| DMoj | 526 | attgcacctattcaattatgaataaatatatttgatt~~~~~catacaaaagact~~~~~ |      |      |
| Dgri | 525 | attgcacctattcaattatgaataaatattctatttc~gattcatacaaaagcattgcca |      |      |

Dmel 606 ~ccccct~~~~~aggaagt~~~~~gccg~~~~gtaca~~~~~  
Dsim 593 ~ccccct~~~~~aggaagt~~~~~gccg~~~~ggtaca~~~~~  
Dsec 579 ~ccccct~~~~~aggaagt~~~~~gccg~~~~tctaca~~~~~  
Dere 636 ~cccc~~~~~~aggaagt~~~~~gccg~~~~gtaca~~~~~  
Dyak 638 ~ccccct~~~~~aggaagt~~~~~gcag~~t cagtaca~~~~~  
Dpse 725 ~~~~~~aggaagt~~~~~~~~~~ggagtc~  
Dana 650 ~~~~~~aggaagt~~~~~~~~~~gcggtc~  
Dvir 561 cagcccttgcagctca~gcatattaaagactacgcaaagaaaataaaaaaaaaaagacag  
DMoj 573 ~~~~~~atggttt~~~~~aaa~aacgaa~~~~~acag  
Dgri 583 tagcccttgc~~~~~~~~~~gcttgcaacaaaagacgacgaaa

Dmel 628 ~~~~~~gtcctaccacagatccg~~~tattctcggaagtcccc~~~~~ag  
Dsim 616 ~~~~~~gtcctaccacagattcg~~~tattctcggaagtcccc~~~~~ag  
Dsec 602 ~~~~~~gtcctaccacagattcg~~~tattctcggaagtcccc~~~~~gac  
Dere 657 ~~~~~~gtcctaccacagattcg~~~tattctcggaagtcccc~~~~~ag  
Dyak 663 ~~~~~~gtcctaccgcagattcg~~~tattctcggaagtcccc~~~~~ag  
Dpse 738 ~~~~~~cctgcaacagattcactatattctcggaagtttt~~~~~tg  
Dana 663 ~~~~~~ctagc~acagatttg~~~agttctcggaagttttcc~~~~~aa  
Dvir 620 aatgg~~~~~aacagat~~~~~tattctaggaagttgcca~~~~~gaa  
DMoj 595 aaaaaa~~~~~cccaaagat~~~~~tattataggaagttaa~~~~~aa  
Dgri 617 aaaagcacgcagaatagaaaagat~~~~~tattctaggaagttgcttagtaaacacagaa

Dmel 665 caagggcatcc~~~~~gacgagg~~~~~gctgg  
Dsim 653 caagggcatcc~~~~~gacgagg~~~~~gctgt  
Dsec 640 caagggcatcc~~~~~gacgagg~~~~~gctgg  
Dere 694 caagggcatcc~~~~~aacgagg~~~~~gctgg  
Dyak 700 caagggcatcc~~~~~aacgagg~~~~~gctgg  
Dpse 775 caagggcacac~~~~~gacgagg~~~~~gctgg  
Dana 699 caagggcgttc~~~~~gacgagg~~~~~gctgg  
Dvir 653 caagggcaaaactgtgtacttgagcagccagagagagctc~~gagacggc  
DMoj 628 caagggcaaaa~~~~~actagaggaact~~tgagaactcgactcaaggc  
Dgri 671 caagggcaac~~aatagacttgaggaact~~ttagaactcg~~~aaggc

kkv-WE1

Dmel 1 caacaaaggattgaagggaaatatatgc~~~~~tctgc~~gaatgaattaa~~ata~t  
Dsim 1 cagcaacggattggcggaataacttggccttagatcgac~~gaatgaattat~~tta~t  
Dyak 1 tttatatggtcggaacgcttctctctgctgttacatacttttcaacgaatctagtata  
Dere 1 ~~~~~~  
Dpse 1 ~~~~~~  
Dper 1 ~~~~~~  
Dana 1 ~~~~~~  
Dvir 1 CAATTTCCCTTTAGAAATGCCATTGGTGGGGGGAAGTTTTTTTTGGGACCCGCCCGCTTA  
Dmoj 1 ~~~~~~  
Dgri 1 tcaataagcttttatttcggttgatttaactatttaggaatttgaatcatctctcgatc

Dmel 49 tcacttttttaggagatac~~~~~  
Dsim 56 tcactttttggaaggtacatttgttaaaatgt~~~~~  
Dyak 61 cccttttactctacgagtaacgggtataataatcttccccctttgatttaaaggatgtaa  
Dere 1 ~~~~~~  
Dpse 1 ~~~~~~  
Dper 1 ~~~~~~  
Dana 1 ~~~~~~  
Dvir 61 AATAAATAAAAAATTTTTTTTTTATAAATTTTCAATTTCCCTTGTGTCTGGGGGCGGTAG  
Dmoj 1 ~~~~~~ct  
Dgri 61 accttgtgaagtaggcgtagtgaaatgaaaagcaaagtgatccaatattttggtgcaa

Dmel 66 ~~~~~~g~~~~~taaactaatttttctgtgcacataaaggctatgtatgcggttaa  
Dsim 87 ~~~~~~a~~~~~taaactgaatctttctgtgcacagatacggctgtgtatccggtcgaat  
Dyak 121 acaatatattgcataaaactgatttttctgtgcaccataaaggtaagtatccggtccgaat  
Dere 1 ~~~~~~taaactgatttttctgtgcaccgatgaaggatgtatccgcccgaat  
Dpse 1 ~~~~~~aa



Dere 242 ~~~~~gtggcgcacaaattgattgctacacttaagccaactagtcaaaacgggaacgcgg  
Dpse 244 t~~~ggtggcgcataaattgattgctacatttaagccaactagtcaaaacgggaacacgg  
Dper 245 t~~~ggtggcgcataaattgattgctacatttaagccaactagtcaaaacgggaacacgg  
Dana 221 tggggctggcgcataaattgattgctacatttaagccaactagtcaaaacgggaacacgg  
Dvir 428 ~~~~~AAATTGATTGCTACATTTA~~~~~ACAACGGAAACAA~~  
Dmoj 304 ~~~~~aaattgattgctacattta~~~~~acaacggaaacga~~  
Dgri 403 ~~~~~aaattgattgctacattta~~~~~acaacggtaacga~~

Dmel 391 c~~~~aaccga~~~~~agc~~~~~ggccacgccaa  
Dsim 412 c~~~~aaccga~~~~~agc~~~~~ggccacgccaa  
Dyak 438 ~~~~~ggccccgccaa  
Dere 298 c~~~~agtgcg~~~~~agc~~~~~ggccacgccaa  
Dpse 301 c~~~~cgaaccggcccagacctg~~~~~ggccacgccag  
Dper 302 c~~~~cgaaccggcccaggctg~~~~~ggccacgccag  
Dana 280 ~~~~~c~aatcg~~~~~aacc~~~~~ggccacgccag  
Dvir 460 ~AATCGAACCAATCGAACCAAAACGTGT~~~~~CCAAACCGGCCACGCCAA  
Dmoj 336 ~aaacgaaccaatcgaaccgacgaatggaccgacccaccagccaaacgggccacgccaa  
Dgri 435 ~aaccgcacaaatcgaaccaatcgc~~~~~caaaccggcccacgccaa

GRH

Dmel 412 ccagctgcctactgc~~~~~tattgccgatcgccgatcgctggttgcagttgctga  
Dsim 433 ccagctgcctactgcctgctgctattgccgatcgccgatcactg~~~~~gctgctgat  
Dyak 450 ccagctgcctactac~~~~~tcttgccgatcgccgatt~~~~~  
Dere 319 ccagctgcctactgc~~~~~tattgccgatcgacgatt~~~~~  
Dpse 331 gcagcagctgcccagctgctgcccagctgctgct~~~~~  
Dper 332 gcagcagctgcccagctgctgcccagctgctgct~~~~~  
Dana 302 ccagctgctgattgc~~~~~  
Dvir 505 GCTGTCCGGCTGTCCGGCAGTCCGACAACCTGAGTCCAACCTTGTATTATAAGCGTTGCTAA  
Dmoj 396 gccggacagccagcaacagcaacagcagctgccgcagcaactgcgtccgacttgtatcat  
Dgri 477 gctcttggccaacaacaaaactgcagcggccaagactcgtatcatgag~~~~~

Dmel 464 ttgctgattgccgatggccggacaaccagtttt~~~~~cggcggacaac  
Dsim 486 t~~~~gcccggacaaccagtttt~~~~~cggcggacaac  
Dyak 482 ~~~~~gcccggacaaccagtttt~~~~~cggcggacaac  
Dere 351 ~~~~~gcccggacaaccagtttt~~~~~cggcggacaac  
Dpse 364 ~~~~~cggacaaccagttct~~~~~cggtgcccaac  
Dper 365 ~~~~~cggacaaccagttct~~~~~cggtgcccaac  
Dana 316 ~~~~~cggacaaccagtttt~~~~~tggtggacagc  
Dvir 565 C~~~~CAACCAGTTTTTAATA~~~~~GAGTAC  
Dmoj 456 aagacag~~~~~agaccagtttct~~~~~tgctggagtac  
Dgri 524 ~~~~~caaccagttttaacatttttttttttttaacagtagtac

Dmel 508 aggaaaagccagcgaactgcg~~~~~gccaagaaatagcgccaatat~~~~~gactgaaa  
Dsim 515 aggaaaagccagcagactgcg~~~~~gccaagaaatagcgccaatat----gactgaaa  
Dyak 511 aggaaaagccagcaggtacg~~~~~gccaagaaatagcgccaatat----gactgaaa  
Dere 380 aggaaaagccagcagactgcg~~~~~gccaagaaatagcgccaatat----gactgaaa  
Dpse 391 aggaaaagccagcgcctcttggccaagccaagaaatagcgccaataa----gactgaaa  
Dper 392 aggaaaagccagccacctcttggccaagccaagaaatagcgccaataa----gactgaaa  
Dana 343 aggaaaa~~~~~ccaagaaatagcgccaataaataagagtaaaa  
Dvir 588 CACAGGAACAGTGAGCGACTTGAAACGTA~~~~~  
Dmoj 485 aacaggaacaataagcgactttaaaag~~~~~  
Dgri 563 aggaaaatgc~~gatcgacttgaaaag~~~~~

Dmel 558 tagtagcatta~~~~~tgcgaaaa~~attgcat~gccaagcaa~~gccgg~aacgaacgg  
Dsim 565 tagcagcatta~~~~~tgcgaaaa~~attgcag~gccaaccaa~~gccgg~aacgaacgg  
Dyak 561 aagcaggcatta~~~~~tgagaaaa~~attgcag~gccaaccaa~~gccgg~aacgaacgg  
Dere 430 tagcaggcatta~~~~~tgcgcaaaa~~attgcag~gccaaccaa~~gccgg~aacgaacgg  
Dpse 447 ttgt~~~~~aa~~attgcaa~tcgaagcaa~~gccgg~aacgg~~~~~  
Dper 448 ttgt~~~~~aa~~attgcaa~tcgaagcaa~~gccgg~aacgg~~~~~  
Dana 383 ttgt~~~~~aagcatt~~aagt~gaa~aaattgcaggcaagttaag  
Dvir 616 ~~~~~TGCGAAAAACATGCCCAAACATAAAA~~~~~GATAAAAGT~AGCA  
Dmoj 511 ~~~~~tggcattgcgcaaaacatgcccaaa~caatgactgcgataatggccagca

Dgri 587 ~~~~~~ta~~~~~tgcgcaaacatgcccaaacatgacaaataatggcagcagtaa  
Dmel 608 c~~gggtgaattgg~~~tgg~~tgacatggacaagacggggcaagttttggagtggcgat  
Dsim 615 c~~gggtgaattgg~~~tgg~~tgacatggccaagacggggcaagttttggagtggcgat  
Dyak 611 c~~gagtgaat~t~~~~tgg~~tgacatggccaagtcgggacaagttttggagtggagat  
Dere 480 c~~gagtgaat~t~~~~tgg~~tgacatggccaagacggggcaagttttggagtggcgat  
Dpse 478 ~~~~~aacgaagcgaca~tgg~~tgacatggctgagatggggaaggcaggctctg~at~~~  
Dper 479 ~~~~~aacgaagcgaca~tgg~~tgacatggctgagatggggaaggcaggctctg~at~~~  
Dana 421 ccggaacgaa~ctacaatgg~~tgacatagccaagatg~~~~tggcaggctctggaggag  
Dvir 656 ACAAATGCTGTCAGAATAGTGACATAGGAAGGTAATATGGACTAAACCGATTATACAAT  
Dmoj 561 atgaatatgatcagaacgggtgaacatggcagggcagcatgatctagctgcatcaatgtg  
Dgri 634 atgtggccagaatgccgcatagaaaggcaatatgaaccgaacgggtatataaatggctta

Dmel 661 c~~~~~cggggagggacaaccatgggtgtgtgggttcaatgcg  
Dsim 668 c~~~~~cggggagggacaaccatgggtgtgtgggttcaatgcg  
Dyak 661 c~~~~~cggggagggacatccatgggtgtg~~ggttcaaagcg  
Dere 530 c~~~~~cggggaagggcatccatcgggtgtg~~ggttcgaggcg  
Dpse 528 tcgggtggcacggtagcaaggggtcgggcaggggtt~ccatgggtgtgggttcagatc~ac  
Dper 529 tcgggtggcacggta~~~~~gcaggggtt~ccatgggtgtgggttcagatc~ac  
Dana 474 t~ggagggac~t~ggaatgggt~g~tggag~ccagtggt~~~~~cag~tccac  
Dvir 716 TGTTTTAAAGTAATTCTGAATAAATGGAGAATAGTTCAGGTATATCGGTTTCAGGTATT  
Dmoj 621 ggttcaatcaattgtgctataaatgctgtatataatcttctgtaaaatgggtc~~~~~  
Dgri 694 accactgcaatcgaggtgtgggttcaatgggcattgactgactgaccactggt~~~~~

Dmel 699 cagtggtcagctggctgggttggctcaagtcaacttactcaaacatcgatttatgctt  
Dsim 706 cagtggtcagctggctgggttggctcaagtcaagtactcaagccatcgatttatgctt  
Dyak 697 tagtggttagcttgcctgggttggctcaagtcaagtactcaagccatcgatttatgctt  
Dere 566 cagtggtcagctggctgggttggctcaagtcaagtactcaagccatcgatttatgctt  
Dpse 586 tgggaattgaccatttaagtt~~~~~attgatttatgcat  
Dper 575 tgggaattgaccatttaagtt~~~~~attgatttatgcat  
Dana 515 tgg~atcggccatttaagct~~~~~attgatttat~~~~  
Dvir 776 TGCGCTTAACATATGGTTTTTACATATAAGCAGAGCTAGTGCAATTCTTGAATTCCTCCAT  
Dmoj 673 ~~~~~~  
Dgri 746 ~~~~~~

Dmel 759 gccacgac~~~aga~gagccacaattgcttgaaggttgctgcaatccgattgcaggaat  
Dsim 766 gccacgac~~~gga~gagccacaattgcttgaaggttgctgcaatccgattgcaggaat  
Dyak 753 gccacaac~~~gga~gagccataattgcttgaaggttacctgcaatccgattgcaggaat  
Dere 622 gcctcaac~~~gga~gagccacaattgcttgaaggttgctgcaatccgattgcaggaat  
Dpse 620 gctacggccagagtggtgctgctgctgctgaaggttgctgcaatccgattgcaggaat  
Dper 609 gctacggccagagtggtgctgctgctgctgctgaaggttgctgcaatccgattgcaggaat  
Dana 543 ~~~~~~gt~~~~~t~tatttgaaggttgcc~~~~~t~~~~~g  
Dvir 836 GCAGTTCAACAAACCTCAATTTCTTTCAAGACCTGTCAATTAAGAGTTTTTGC~~~~~  
Dmoj 673 ~~~~~~  
Dgri 746 ~~~~~~

GRH

AP1

-----  
Dmel 815 accagttgctatcgatccggg~~~~~tgattcatggctgcgcatgc  
Dsim 822 accagttgctatcgaccggg~~~~~tgattcatggctgcgcatgc  
Dyak 809 accagctgctatcgaccggg~~~~~tgattcatggctacggatgc  
Dere 678 accagttgctatcgccccgga~~~~~tgattcatggctgctgcatgc  
Dpse 677 gaatgccaccttgaggggatt~~~~~ggcttgtatgaatca~~~~~tagg  
Dper 666 gaatgccaccttgaggggatt~~~~~ggcttgtatgaatca~~~~~tagg  
Dana 564 gaat~~~~~ct~~~~~gattgcccggagtactagtacagatgactca~~~~~  
Dvir 889 ~~~~~~  
Dmoj 673 ~~~~~~  
Dgri 746 ~~~~~~

Dmel 856 cagacgatccatcttggaggtgcacctagcagctagcaccagctcgaa~agatcgccaa  
Dsim 863 cagacgatccatcttggagctgcacctagcagctagcaccagctcgaa~agatcgccaa  
Dyak 850 cagacaatccatcttggagcgc~~~~~gca~~tagcaccagctcgaa~agatcgctta  
Dere 719 cagacgatt~~~~~caccactc~aagagatcgctta

Dpse 717 tatagatctttggccatacagagtattcctagaaattaagttcaattcagttaaagaaaag  
Dper 706 tatagatctttggccatacagagtattcctagaaattaacctaagttcagttaaagcaaag  
Dana 599 ~~~~~caggcatttga~~~~tgtgtggaagctgcacccaacttgagttaaag~~~~~  
Dvir 889 ~~~~~  
Dmoj 673 ~~~~~  
Dgri 746 ~~~~~

Dmel 915 tcga~gct~tgga~gagcttactccgctcgatttgagcactggataaatttgtaaagtttt  
Dsim 922 tcga~gct~tgga~gagcttactccgagatttgagcactggataaatttgtaaagtttt  
Dyak 902 tgaa~gctatcaaaagagcttac~actctgctttaa~~~~~gcaaagtttt  
Dere 750 ~ccatgct~ttgga~gagcttactccgctgatttaagctctggataaatttgtaaagtttt  
Dpse 777 catttgctaaagtcgaggcagat~~~~~  
Dper 766 catttgctaaactcgaggcagtttatggggataaaagagattctaaaagaagctatatatt  
Dana 642 ~~~~~  
Dvir 889 ~~~~~  
Dmoj 673 ~~~~~  
Dgri 746 ~~~~~

Dmel 972 ggttatcacattttcattggttaacaatttgcaac~~~~~  
Dsim 979 ggttatcacattttcattggttaacaatttgcaa~~~~~  
Dyak 946 agttatcacattttc~ttgcetaacaatttgaaa~~~~~  
Dere 808 agttatcacattttcattggttaacaatttgcaa~~~~~  
Dpse 799 ~~~~~ctacttgaccctacaaacagggtcagtatctatggaagtatc  
Dper 826 ctgggaattataaaataaaaactacttgactctacaaacaggccagtatctaaggaagtatc  
Dana 642 ~~~~~taagatgatattcaagt  
Dvir 889 ~~~~~  
Dmoj 673 ~~~~~gagaatgt~~~~~  
Dgri 746 ~~~~~aacgggtt~~~~~

Dmel 1005 ~~~~~ttaacattgagccgataata  
Dsim 1012 ~~~~~ttaacattgagccgataata  
Dyak 978 ~~~~~ttaacataca~ccgataata  
Dere 841 ~~~~~ttaacataaaaaccgataata  
Dpse 841 tttatgggatctatggctatcatctgtagagtagtttcaattaacattcgactgataatt  
Dper 886 tttgtgggatctatggctatcatctgtagagaagtttcaattaacattcgactgataatt  
Dana 660 ctgtttcaataaaactttgagtggtatagacaacagtttaattaacagtgagttgataatt  
Dvir 889 ~~~~~  
Dmoj 681 ~~~~~attatggttgagaatgggtt  
Dgri 754 ~~~~~ggcaataggaagtattgccc

Dmel 1026 aatgctaagtttg~aatg~~~~~  
Dsim 1033 aatgctaagtttg~attg~~~~~aa  
Dyak 998 ggtggtaggtag~agtgtctggactgaatctttaaaatacttcttttaa~~~~~  
Dere 862 tatgctaag~ttgcagtg~~~~~tatatataaaaacaccactttt~aa~~~~~  
Dpse 901 tacattttaaagctaataaacaataatacaaaaagcaaatcgaatttcagcttttcaaa  
Dper 946 tacattttaaagctaataaacaataatacaaaaagcaaatcgaagttccagcttttcaaa  
Dana 720 ttcctt~~~~~  
Dvir 889 ~~~~~  
Dmoj 702 gagaacgattgctgcatactcgagaagtattacc~~~~~  
Dgri 775 acgagctataaaacaaaatggacgagtggtgggacccggaatgggaagttttttaaatg

Dmel 1043 ataaaacattcgaaactattg~aaaat~~ttgaag~~~~~tttc~aaa~tatttttc  
Dsim 1052 aaaacacattcgaaactattg~aaagt~~ttcaag~~~~~tttc~aaa~tattttcc  
Dyak 1047 ~~~~~aaaccttttacaaaaacttaa~~~~~aaac~aaaataattttcc  
Dere 901 ~~~~~aaaccttttacaaaaacttaa~~~~~aaac~aaaatacttcac  
Dpse 961 ccagtaaaaggaaaagcaaaaactttctgagata~~~~~aacaaaactaaag  
Dper 1006 ccagtaaaaggaaaagcaaaaactttctgtgatataatgtctataaaaactaaag  
Dana 725 ~~~~~  
Dvir 889 ~~~~~  
Dmoj 735 ~~~~~  
Dgri 835 gtttaaaattatataatggtgcccgcacagctgaagattttccttagagtgagacaagc

Dmel 1089 ~aac~~~~~a~~~~~aacagtc~~~aa

Dsim 1098 ~aac~~~~~a~~~~~aacgctc~~~aa  
Dyak 1084 ~taacctttataactaaaaagatgaaacattggaaattatttaaaatgtgaa~gttttta  
Dere 939 gtaaccgctataactaaaatgatgaaacattcgaaatttt~~~~~gaa~gttttta  
Dpse 1008 ttttactgatgggtgtcttaaacacggaactgttattgagaaagtctggaccatattctg  
Dper 1066 ttttactgatgctgtcttaaacacggaactgttattgagaaagtctggaccatattctg  
Dana 725 ~~~~~~  
Dvir 889 ~~~~~~  
Dmoj 735 ~~~~~~  
Dgri 895 tcatgtgaaatgaaatggcttagtttgggcttagatattcttgttattttgtgaactgtg

Dmel 1103 tatttcttttag~aggattagttaaatcatcacatttcagata~catacatttatttattt  
Dsim 1112 tatttctttat~aagatta~~~~~agata~catacatttatttattt  
Dyak 1143 tattt~tttatcaa~a~c~~~~~a~~~~~ttct~~~at~~attttttata~  
Dere 989 tattt~ttca~~acgaac~~~~~attcagcat~~acttctttataa  
Dpse 1068 aagaagcgaagccctctaaccacaaacttgttccaattggcgtgaattttcttc~~~~~  
Dper 1126 aagaagcgaaacctctaaccacaaacttgttccaattggcgtgaattttcttcacaaa  
Dana 725 ~~~~~~t~t~~~~~c~a~~~~~ttatt~~~att~~~~~tg~att~~~~~ttc~~~~~  
Dvir 889 ~~~~~~  
Dmoj 735 ~~~~~~ccgaaaactcaacattattcgagaatatttcaaatattgtttcaaaacaa  
Dgri 955 atttgtgtcttgagttcaataa~~~~~

Dmel 1160 ~ttgtatataatgtatata~atata~~~t~~tttg~~~gtcagctcatttaattta~~~~~ca  
Dsim 1151 ~atg~~~~~tacat~atata~~~a~~tttg~~~gtcagctcatttaattta~~~~~ca  
Dyak 1175 ~agaaaaa~~t~taaatcat~~~~cacatt~~~~~ccagctcattttatttaattttca  
Dere 1025 gat~tagt~~~~~tgaatcacattccagctttgtatgt~~~ctcgtttaatttaattttta  
Dpse 1122 ~~~~~~atcatttcaatgatgaatcacttaagataatggattcaaaag  
Dper 1186 tgaataaagatgaacatagcatttcaatgatgaatcacataagataatggattcaaaag  
Dana 746 ~~~~~~attaatttaaat~taaat~ac~~~agataatgaaat~aagag  
Dvir 889 ~~~~~~  
Dmoj 786 ttttaaggctgtataagaaataatccattaacgttcatctaaagatagtttttaaaaatt  
Dgri 977 ~~~~~~

Dmel 1206 gttctttcacctgtttggtatc~~~~~  
Dsim 1189 gttctttcacctgtttggtatc~~~~~  
Dyak 1222 gttcatacaccttttgggtatc~~~~~  
Dere 1077 gttctttcgccttttgggttc~~~~~  
Dpse 1165 aactcctaaaaat~a~tata~~~t~atagga~cattactatagccctacctcctggcttcg  
Dper 1246 aactcctaaaaat~a~tata~~~t~atagga~cattactatagccctacctcctggcttcg  
Dana 781 ~atttctaaaaatgacttttaattatagcctcatt~gtata~~~~~t~~~t~ct~~~tt~g  
Dvir 889 ~~~~~~  
Dmoj 846 cgtaataaataatgtaataattcattaaaaataattctaaaaaaataataattcttt  
Dgri 977 ~~~~~~

Dmel 1226 ~~~~~~  
Dsim 1209 ~~~~~~  
Dyak 1242 ~~~~~~  
Dere 1097 ~~~~~~  
Dpse 1219 t~~~ttctgtgccataaaaaagagacactt~t~aacttcttgccaactcatt~tt~tttt~a  
Dper 1300 c~~~ttctgtgccataaaaaaagacactt~t~aacttcttgccaactcatt~tt~tttt~a  
Dana 828 taatt~t~t~~~at~~gca~agtc~ctcatcaaagtcatgacagctcagctcttattttga  
Dvir 889 ~~~~~~  
Dmoj 906 cagcggaaattcgagaatagttaagacataactaagtagatcaagaataacttaataaaaact  
Dgri 977 ~~~~~~

Dmel 1226 ~~~~~~ctgtttgtctgcaaactgttttaccg~~~t  
Dsim 1209 ~~~~~~ctgtttgtctgtaaactgttttaccg~~~t  
Dyak 1242 ~~~~~~ctgtttgactgttaactgttctactg~~~t  
Dere 1097 ~~~~~~ctctttgtctgtaaactgttttaaaaaat  
Dpse 1272 agttccttcaacttgt~~~tttgtt~ttt~tctgtttatctgttaagcattttaccg~~~t  
Dper 1353 agttccttcaacttgt~~~tttgtt~ttt~tctgtttgtctgttaagcattttaccg~~~t  
Dana 879 agttccttccactt~taatttgttgtttgtct~tttgtctgtaaaccgctttaccg~~~t  
Dvir 889 ~~~~~~  
Dmoj 966 tcctagttcttattagacattcaataaattgtttctgcctagttgaacaatcgttccag

Dgri 977 ~~~~~  
Dmel 1253 ~~tgcattcttgcaaatataaaaaa~ct~t~~~~~tttcgacttg~~~~aagtg  
Dsim 1236 ~~tgcattcttgcaaatataaaaaaact~t~~~~~tttcgactcg~~~~gagtg  
Dyak 1270 aatacactcttg~aatat~~~a~~~~~  
Dere 1127 ~ttcagt~tt~~~aa~at~~cact~ctgat~~~~~ttttg~t~~~~~a~tg  
Dpse 1324 ~tatatccgtgcaaatatacaaaagaaaccacacaacctttcgacttg~~~~aagtg  
Dper 1405 ~tatatccgtgcaaatatacaaaagaaacagcacaacctttcgacttg~~~~aagtg  
Dana 933 ~tatatccgcgcaata~~~tacaaa~~~~~ac~ca~~~~~t~tttgtcttaaaaatg  
Dvir 889 ~~~~~  
Dmoj 1026 actggttcaaattcaaattcagttcaagtgcagctgccttacgttgaatgtgccttgagc  
Dgri 977 ~~~~~

AP1

-----  
Dmel 1295 aatcactc~ggattttcggttaaattat~~~~~tttctaccaactttaccgtaaccaa  
Dsim 1279 aatcactctgattttggtgaattcat~~~~~tttctaccaactttgacttaaatcaat  
Dyak 1288 ~~~~~gat  
Dere 1157 ~~~~~taaattttgc~cgt~tttctgctctacccg~acctaataat  
Dpse 1380 ca~gcaa~aatgatatgtgactcaccaaaacattttttgggtac~~~~~aa  
Dper 1461 ca~gcaa~aatgatatgtgactcaccaaaacattttttgggtac~~~~~aa  
Dana 976 ca~acaa~~~~~agctccg~~~tc~~~~~acacagtttttg~~~~~aa  
Dvir 889 ~~~~~  
Dmoj 1086 tttatctgccaattctactcagtgctcgcagcacacctcaacat~~~~~cc  
Dgri 977 ~~~~~accttaaga~~~~~gt

Dmel 1347 caaaaggcgttcagttgcagaaaacttgactattttttcaataatgatgctcaagattga  
Dsim 1332 taaaagtcattcaattgcagaaaacttgac~~tgttttcaataatgatgataagagtga  
Dyak 1292 t~~aa~~~~~a~~~~~tt~~~~~caggta~~~~~  
Dere 1197 taaaaggcattcaattgcagacaacttaaa~~tgttttcaataatgatgtagaagggtga  
Dpse 1424 tacaagaga~gtttttc~~~~~gttttcagccaattaaaaggcatt  
Dper 1505 tacaagaga~gtttttc~~agttt~acaaatttttcgttttcagccaattaaaaggcatt  
Dana 1006 tataattggcgttttggtcctggttgac~ga~~~~~ctaaaccaattaaatggcatt  
Dvir 889 ~~~~~T  
Dmoj 1132 actcaagcgtgtcaattcaaaattcttaagcttgatttttttctttttgtatattcatt  
Dgri 990 tccttaag~~~~~

Dmel 1407 atcgtggtattttgatt~~~~~  
Dsim 1390 atc~~~~~  
Dyak 1303 ~~~~~catattttgatt~~~~~  
Dere 1255 atcaaggatattttgatt~~~~~  
Dpse 1464 aaaatgcaagaatta~~~~~caatg~~ctattgagggattcatgtggca~ct~cg  
Dper 1561 aaaatgcaagaatta~~~~~caatg~~ctattgagggattcatgtggca~ct~cg  
Dana 1056 aaattgcaaaaaatgatgattgtctacattgggct~ttga~~aattcaaaaagcatctgca  
Dvir 891 TCGCCAACTCATTGAGTCAAGTTCAGTCACTTATTATCTGCCATCATAATACTGTTATG  
Dmoj 1192 ttgccaactcattgagtcagttccagctcgtattatttaccacgattaccgttatg  
Dgri 998 ~~~~~ctcattaagtcagtttggttgccatc~~~~~gttata

Dmel 1423 ~~~~~gtgggaa~~~~~  
Dsim 1392 ~~~~~gtgggaa~~~~~  
Dyak 1315 ~~~~~atgtgga~~~~~  
Dere 1271 ~~~~~atgtgaa~~~~~  
Dpse 1510 gat~ggt~g~tgcactataaaactgatttgaagtgattttaacaagtgtgaa~~~~~  
Dper 1607 gat~ggt~g~tgcactataaaactgattcgaagtgattttaacaagtgtgaa~~~~~  
Dana 1113 gatcagtcagatgaat~t~taatttaaatcgaa~tcattttgatta~tatgaa~~~~~  
Dvir 951 CAGATACACATAAATAAATTCAGACCTCAACCAACT~~~~~  
Dmoj 1252 cacatgc~~~~~ataaattcaagacccagccaacaacgt~~~~~gtgagt  
Dgri 1033 cacattcacataaataaatacaagacctccatttgagt~~~~~ctgagt

Dmel 1430 ~~~~~  
Dsim 1399 ~~~~~  
Dyak 1322 ~~~~~  
Dere 1278 ~~~~~

Dpse 1558 ~~~~~  
Dper 1655 ~~~~~  
Dana 1162 ~~~~~  
Dvir 987 ~~~~~  
Dmoj 1293 cacgaagat t t t t g t a c g a ~ ~ ~ ~ ~ t t c a t a a a c t t t g c t c a t a a c t t t g a c a g c  
Dgri 1077 c a c a a g t t t t c g g c g g t t c t c t t t g c a t t c t t c a t a t a ~ ~ ~ t g c t c a t t t c c t t a c a c c e

Dmel 1430 ~~~~~  
Dsim 1399 ~~~~~  
Dyak 1322 ~~~~~  
Dere 1278 ~~~~~  
Dpse 1558 ~~~~~  
Dper 1655 ~~~~~  
Dana 1162 ~~~~~  
Dvir 987 ~~~~~  
Dmoj 1341 a t t t t a g t g c a a t ~ ~ ~ ~ ~  
Dgri 1134 t t g c a a t g g g t a t t a t a a a t t t c c t g g t g a g g t t t g t t a t t t a t t g a a g g c a a c g t t t c t g

Dmel 1430 ~~~~~  
Dsim 1399 ~~~~~  
Dyak 1322 ~~~~~  
Dere 1278 ~~~~~  
Dpse 1558 ~~~~~  
Dper 1655 ~~~~~  
Dana 1162 ~~~~~  
Dvir 987 ~~~~~  
Dmoj 1353 ~~~~~  
Dgri 1194 g g a a c a t c t t t t g t t a c t t t g t t a c t t a a c a c t c a a t g c t c a t a a a a t t t g g a g a c g t a c

Dmel 1430 ~~~~~  
Dsim 1399 ~~~~~  
Dyak 1322 ~~~~~  
Dere 1278 ~~~~~  
Dpse 1558 ~~~~~  
Dper 1655 ~~~~~  
Dana 1162 ~~~~~  
Dvir 987 ~~~~~  
Dmoj 1353 ~~~~~  
Dgri 1254 a a a a t c a c t c a g a c t a c t c a a t g a t a t a g c t t t c a t a a g a a c a t a a g t a g a a a g t c a g a t

Dmel 1430 ~~~~~  
Dsim 1399 ~~~~~  
Dyak 1322 ~~~~~  
Dere 1278 ~~~~~  
Dpse 1558 ~~~~~  
Dper 1655 ~~~~~  
Dana 1162 ~~~~~  
Dvir 987 ~~~~~  
Dmoj 1353 ~~~~~  
Dgri 1314 t t t g g c a g a t t g c c t c t a c t c t g c a a a g g t t t t t a a t c t t c g g g a t g c c a a a g t g t t g t t

Dmel 1430 ~~~~~  
Dsim 1399 ~~~~~  
Dyak 1322 ~~~~~  
Dere 1278 ~~~~~  
Dpse 1558 ~~~~~  
Dper 1655 ~~~~~  
Dana 1162 ~~~~~  
Dvir 987 ~~~~~  
Dmoj 1353 ~~~~~  
Dgri 1374 a t t t t t t g a t a a t t a g t a t g t c t c a a t t a a a c t g a c g g a a a t c a a t a g g a a t t c t t g g t t

Dmel 1430 ~~~~~

Dsim 1399 ~~~~~  
Dyak 1322 ~~~~~  
Dere 1278 ~~~~~  
Dpse 1558 ~~~~~  
Dper 1655 ~~~~~  
Dana 1162 ~~~~~  
Dvir 987 ~~~~~  
Dmoj 1353 ~~~~~  
Dgri 1434 aacatcaatgattctacgaaacttcgatacatatgtatatatgcatatatacattgttca

Dmel 1430 ~~~~~  
Dsim 1399 ~~~~~  
Dyak 1322 ~~~~~  
Dere 1278 ~~~~~  
Dpse 1558 ~~~~~  
Dper 1655 ~~~~~  
Dana 1162 ~~~~~  
Dvir 987 ~~~~~  
Dmoj 1354 aatctgaaacatcattaaggattttcggctctatacaatagagttatattaaggatatt  
Dgri 1494 ta~~~~~

AP1

-----

Dmel 1430 ~~~~~atgagtcacaaaagagctt~aatatttggattttacgtaatgagtg  
Dsim 1399 ~~~~~atgagtcacagaagagctt~aatatttggattttacgtaatgagtg  
Dyak 1322 ~~~~~atgagtcacagtagtgctt~aatatttggattttacgtaatgactg  
Dere 1278 ~~~~~atgagtcacagtagaggtt~aatatttggattttacgtaacgagtg  
Dpse 1558 ~~~~~atgagtcacagtagagctt~aatgtttggtttttacggtatgcgta  
Dper 1655 ~~~~~atgagtcacagtagagctt~aatgtttggtttttacggtatgcgta  
Dana 1162 ~~~~~gtgagtcactg~aaaactttaatgtttggtttttacg~ta~aagta  
Dvir 987 ~~~~~CTGACTCACAAAATTTGAACGGCTCGTACGCCTTCCACTGAATTCC  
Dmoj 1414 tagtctgttgcgctatgagtcacaagagtttgcacaaaact~  
Dgri 1495 ~~~~~atgagtcacgaa~gtttgctcataac~

Dmel 1476 agttgaa~  
Dsim 1445 agttgaa~  
Dyak 1368 atttgaa~  
Dere 1324 agataaa~  
Dpse 1604 agtcg~a~  
Dper 1701 agtcg~a~  
Dana 1206 agccgga~  
Dvir 1034 ATCCGTAATGCACTTTTGGCCATAACTAAGGACTCTCCATACAATATGCATATGT  
Dmoj 1454 ~~~~~  
Dgri 1520 ~~~~~

Dmel 1482 ~~~~~tccggaactggc  
Dsim 1451 ~~~~~tccggaactggc  
Dyak 1374 ~~~~~tccggaactggc  
Dere 1330 ~~~~~gggactgac  
Dpse 1609 ~~~~~atatcatcttt  
Dper 1706 ~~~~~atatcatcttt  
Dana 1212 ~~~~~at~t~gtcttt  
Dvir 1094 ACTTTAATTATGCACCATGATTACAAAAGTTTACTCATAACCAAAAAAG~  
Dmoj 1454 ~~~~~  
Dgri 1520 ~~~~~ccagatag~

Dmel 1494 acttcatttttgggtttttcttttttttttttttgggtttcccttcagacctgcgaatgatt  
Dsim 1463 acttcatttttgggtttttc~ttttctttcgggtttctctgcagacctgcgaatgatt  
Dyak 1386 ctttaatttttggggtt~ttttggTTTCTTTTCAGACCGGTGAATGATT  
Dere 1340 acttcatttttggg~ttt~ttttgggtttcttttcagacctgagaatgatt  
Dpse 1620 ~c~gtgctcttgtgcactcgtgg~t~ctgagaatgatt  
Dper 1717 ~c~gtgctcttgtgcattcgtgg~t~ctgagaatgatt  
Dana 1222 tcagt~ttctt~t~ttttcggggat~ctgagaatgatt  
Dvir 1142 ~~~~~

Dmoj 1454 ~~~~~  
Dgri 1528 ~~~~~

Dmel 1554 tgtct~tt~tgttc~~~~~gggctttaatttgagcg~accattgat~~~  
Dsim 1519 tgtct~tt~tgttc~~~~~gggctttaatttgagcg~accattgat~~~  
Dyak 1434 TGTCT~TT~TGTTT~~~~~GGGCTTTAATTTGAGCG~CCCATTGAT~~~  
Dere 1388 tgtct~tt~tgttc~~~~~gggctttaatttgagc~accaattgct~~~  
Dpse 1655 tgtct~ct~tgtttgattggggg~actgggggctttcatt~~~~~  
Dper 1752 tgtct~ct~tgtttgattggggg~actgggggctttcatt~~~~~  
Dana 1256 ggtcttctgtgagtagatt~cgg~~~ttgggggtttcgtt~~~~~  
Dvir 1142 ~~~~~TGGTTTTTACGCTATGCGTAACTTAATTTTTTATCTG  
Dmoj 1454 ~~~~~tggtttttacgcagtgcgtaacttaattcgaaactg  
Dgri 1528 ~~~~~tgattttttacacaatgcgtaactgaattcaaagctg

Dmel 1591 ~~~~gggtttattttggg~ttttggaagacttattcatt~~~~catc~~~~~ga~~tga  
Dsim 1556 ~~~~gggtttattttggggttttggaagacttatccatt~~~~cacc~~~~~ga~~tga  
Dyak 1471 ~~~~GGGTTTATTTTT~GGTTTTGGAAGAATTATCCATT~~~~GACC~~~~~GA~~TGA  
Dere 1425 ~~~~gggtttatttt~gggttttgggaagacttagccatt~~~~cacc~~~~~ga~~tga  
Dpse 1692 ~~~~gatgactaaa~~~~~ttgaaggacttattcatg~~~~aatccc~~~ctga~~tga  
Dper 1790 ~~~~gatgactaaa~~~~~ttgaaggacttattcatg~~~~aatccc~~~ctga~~tga  
Dana 1291 ~~~~gatgactgta~~~~~ttttgga~~~~~tattgaaggaccaatccaagctcagctgga  
Dvir 1179 GTGTTAAGCTTTGGGCTTCACCCATTACCAATTAACATTAAGAGATAAATTTATATTTG  
Dmoj 1491 gtattaaattatgggatttttttttttttttttttttactcattgaaatgaggtgaattcggc  
Dgri 1565 tcatttaatttgggtttttttttgtatacaaatattattcatctctgttttctgcatgtttc

Dmel 1635 gtt~gtcatgttt~aatgacacac~ttat~ttt~~~ggtcataa~g~~~~~  
Dsim 1601 gtt~gtcatgttt~aatgacacac~tttt~ttt~~~ggtctt~agg~~~~~  
Dyak 1515 GTT~gtcatgttc~aatgacacac~tttt~ttt~~~ggg~~~c~~~~~  
Dere 1469 gtt~gtcatgttt~aatgacacacatttttcttttttgg~cttca~g~~~~~  
Dpse 1734 gtt~gtcaaaatg~aattatttaacatagtta~~~~~~tcatagtg~~~~~  
Dper 1832 gtt~gtcaaaatt~aattatttaacatagtta~~~~~~tcatagtg~~~~~  
Dana 1338 gtt~gaaattttt~aatgatataatagttaatgaatcagatagc~~~~~  
Dvir 1239 ATTATTGGATAGCTCCTTTGCATATGAACGGTTTTTCGCCTTTTCAACTTTACGTAAAAAA  
Dmoj 1551 tcataatgaagctgaacttaagttaaagtggaagaaggtttgctcaggctgtgggaacca  
Dgri 1625 tcgcttaaataagcttgtcttttaaatgagggcttggttttttttaagttattgaaggac

Dmel 1672 ~~~~~cactttgaaactt~~~~~gga  
Dsim 1638 ~~~~~cttgagaacttt~~~~~  
Dyak 1547 ~~~~~acattttatgcatt  
Dere 1510 ~~~~~cttgg~gacattgtgtggttt  
Dpse 1771 ~~~~~a~~~~~aat~atgatttagc  
Dper 1869 ~~~~~a~~~~~aat~atgatttagc  
Dana 1381 ~~~~~aggagaaatcaagttttaaa  
Dvir 1299 AATCAAAAACAGTTATCAGTCCAAATCTGTCCGATTTGAGC~~~~~  
Dmoj 1611 taaaagagcctaataatgaaatgctcagataaaagtctaacat~~~~~  
Dgri 1685 aagctaataaaaaatagacttatgaagttgaataaataaata~~~~~

Dmel 1689 atttaaaggcatttaagg~~~~~catgttaagaaaa~~~~~gttatagccc~gctcaat  
Dsim 1652 gtgacttcgaatttaaagtaagataagttcaagaaaa~~~~~gttatagccc~gctcaat  
Dyak 1562 g~gattttaaatct~~~~g~~~~~aagttggatat~gtacaag~t~aat  
Dere 1531 g~gattttgaatctgaagtaagatatgtaaaacaaaa~~~~~gttatatcct~gctcaat  
Dpse 1786 cttgaa~attggtaaaaggtgttccccacca~at~ca~aca~t~caa~~~~~tta  
Dper 1884 cttgaa~attggtaaaaggtgttccccacca~at~ca~aca~t~caa~~~~~tta  
Dana 1403 aatgcatatt~ttaaacctctttctata~gagattttcagga~agtttcatcgatttta  
Dvir 1339 ~~~~~  
Dmoj 1651 ~~~~~  
Dgri 1725 ~~~~~

GRH  
-----  
GRH  
-----

Dmel 1738 gc~aaaaacgttctttc~aaagatttaagactagtttttaaaaaacgttcgatcaaac  
Dsim 1706 gc~aaaaacgttctttc~aaagatttacgacaag~tttaaaaaaaattccaataaac  
Dyak 1598 gccaaaaaagat~tttt~aaatatttttagacttg~tttta~~~~~aatttgaataaac

Dere 1584 gc~aaaa~agtacttttttaaatattttagactag~ttttataaacaatttgaatctacc  
Dpse 1833 t~gt~~ttcgttttaacgatgt~ttga~g~~~~t~g~~tattt~tt~gaa~gc~t  
Dper 1931 t~gt~~ttcgttttaacgatgt~ttga~g~~~~t~g~~tattt~tt~gaa~gc~t  
Dana 1460 ttgtattttttttttaagtatttattaatgataaatagcttggttccttagcattgactt  
Dvir 1339 ~~~~~~  
Dmoj 1651 ~~~~~~  
Dgri 1725 ~~~~~~

----

Dmel 1796 gctttggcattgacttttgaagttg~ttg~~gtctggc~gtac~ctctgcaattgaat~  
Dsim 1762 gcttttagcattgacttttgaagttg~ttg~~agctggc~ttac~ctctcaattgaat~  
Dyak 1649 acgtttagcattgaatttgaatttattcttaaaactggcgattaaactcttcgatt~aata  
Dere 1640 ccttttagcattgactttgaca~tt~~ctcttc~gtttacta  
Dpse 1872 taaagtg~a~gaga~aaat~~aaa~cgtttg~ctggtggt~ttg~  
Dper 1970 taaagtg~a~gaga~aaat~~aaa~cgtttg~ctgatgct~ttt~  
Dana 1520 taaatttcaactga~atgtttactttaattttttaatgc~ttgaaacaacagttacttgc  
Dvir 1339 ~~~~~~  
Dmoj 1651 ~~~~~~  
Dgri 1725 ~~~~~~

Dmel 1848 actccaacaacagttacctgctacat~~~~~caaatacaacattgactatttgct  
Dsim 1814 actccaacaacagttacctgctacattgagagaaaaaataaacattgactatttgca  
Dyak 1708 actccaacaacagttacctgctata~tg~gag~aaacaaattaacattgactatttgca  
Dere 1677 actccaacaacagttacctgctatatggatagaaaaaataaacattgacaatttgca  
Dpse 1907 ~~~gttgg~gc~~~~~tg~~~~tgggg~~~aaga  
Dper 2005 ~~~gttgg~gc~~~~~tg~~~~tgggg~~~aaga  
Dana 1578 catggtgacagaaaacct~~~~~ataaacattgagccacaa~a  
Dvir 1339 ~~~~~~AATAAACATTGAATATTTGCG  
Dmoj 1651 ~~~~~~  
Dgri 1725 ~~~~~~aaagcttaataattttgtctt

Dmel 1898 aagccttttgtttggcaacgcgcccagtggaagaatgtgagcgaatccaatgaccaagc  
Dsim 1874 gagccttttgtttggcagcgcgcccactggaagaatgtgagcgaatccaatgagcaagc  
Dyak 1765 gaggcctt~att~cggcgcgccaat~caaaaatgtgagcgaatccaatgagcaaga  
Dere 1737 gaggccttttatttggcagcgcctccactcgaaaaatgtgagcgaatccaatgagcaagt  
Dpse 1926 a~~~~~ga~~~~g~taaacagc~agatgaagaagcg~agagatac~a~ac  
Dper 2024 a~~~~~ga~~~~g~taaacagc~agatgaagaagcg~agagatac~a~ac  
Dana 1615 a~~~~~gatttgtgagtaaa~atttaaatg~agagggcgca~aaatacgagaa  
Dvir 1361 GAGACATTTTAGCTGAGCGCAAGAGAGACG~~~~~TTGTCTAAAATT~~~~~TAAAT  
Dmoj 1651 ~~~~~~  
Dgri 1747 gattgtaagtagtgttaatatgtctataaattatgggatgctatttttttatttactttt

Dmel 1958 tg~cggggagaaaaatcga~gagaagagacc~~~~~  
Dsim 1934 ta~cggggagaagaatcga~gagaagagacc~~~~~  
Dyak 1820 ag~tggggagaagaatcga~gagaagagacc~~~~~  
Dere 1797 ag~cggggagaagaatcat~gagaagagacc~~~~~  
Dpse 1961 ~aaagag~aga~cc~gagc~agacc~~~~~  
Dper 2059 ~aaagag~aga~cc~gagc~agacc~~~~~  
Dana 1659 gaaacagctagaaaggcgaagagccagacc~~~~~  
Dvir 1408 AAGAAAGACAAACAGT~A~GAGAAGAGAGC~~~~~  
Dmoj 1651 ~~~~~~  
Dgri 1807 aaataccaagtttttatgctttcgaactgtggttacttgaaaaaacagttacttgtgctat

Dmel 1985 ~~~~~~  
Dsim 1961 ~~~~~~  
Dyak 1847 ~~~~~~  
Dere 1824 ~~~~~~  
Dpse 1981 ~~~~~~  
Dper 2079 ~~~~~~  
Dana 1688 ~~~~~~  
Dvir 1435 ~~~~~~  
Dmoj 1651 ~~~~~~ataagatataaaa  
Dgri 1867 attgacaaaaaaaaaatcgtcataaaaaaggcgtacgaataaggcaaaaaataaacattaaa

Dmel 1985 ~~~~~  
Dsim 1961 ~~~~~  
Dyak 1847 ~~~~~  
Dere 1824 ~~~~~  
Dpse 1981 ~~~~~  
Dper 2079 ~~~~~  
Dana 1688 ~~~~~  
Dvir 1435 ~~~~~  
Dmoj 1665 ccattttatatatgtaacaatttagtttaattcagaatgttcacatacaaaaatctttcta  
Dgri 1927 tatttgccaagacactttggcagctgctgagcgcgagacattgccccaaaatataaatgagtt

Dmel 1985 ~~~~~tcgagactggagccttgaagac  
Dsim 1961 ~~~~~tcgagactggagccttgaagac  
Dyak 1847 ~~~~~tc~~~~~gacttttgaggac  
Dere 1824 ~~~~~tc~~~~~gagccttgaagac  
Dpse 1981 ~~~~~tcgagactgtgagattccgg~t  
Dper 2079 ~~~~~tcgagactgtgagattgagg~t  
Dana 1688 ~~~~~tcgagacagagaggtt~tggct  
Dvir 1435 ~~~~~  
Dmoj 1725 tgtttttctatacattttcttaagcttccataaaaagatttttagtaaacaaaactttgtctat  
Dgri 1987 aaac~~~~~

Dmel 2008 agaatctcaaagcctgagtg~atctcgc~~~~~tgg~~~~~  
Dsim 1984 agaatctcgaagactgagcgc~atctcgc~~~~~tgg~~~~~  
Dyak 1863 agaatcttgagactgagcgcgcacatctcgc~~~~~tgg~~~~~  
Dere 1840 agaatcttaaaagacggagcgc~atctcgc~~~~~tgg~~~~~  
Dpse 2002 ~~~~~ggaggtggaggt~~~~~ggagggcgtgtcaacaaa~tgtgattgg~~~~~  
Dper 2100 ~~~~~ggaggtggaggt~~~~~ggagggcgtgtcaacaaa~tgtgattgg~~~~~  
Dana 1710 aaacaactcgg~ct~gaggtctaaagtgagggcgtttgagcaaaaatccgattgg~~~~~  
Dvir 1435 ~~~~~CAAAAAAATATATG~GAGAGC  
Dmoj 1785 ttatgcaaagattttgacagtcgctgcgagaagagtaagtaaatatagaaaagagagc  
Dgri 1990 ~~~~~aaacaagagagaagagatt

Dmel 2038 ~~~~~  
Dsim 2014 ~~~~~  
Dyak 1895 ~~~~~  
Dere 1870 ~~~~~  
Dpse 2040 ~~~~~  
Dper 2138 ~~~~~  
Dana 1760 ~~~~~  
Dvir 1457 GAGAGAGAGAGAGAGAGAGAGGCGACTCACTGCTTGTATATCTCCACAAAGAAAAAACAT  
Dmoj 1845 gaaaaagagagagagaaagagagcaatcgtatttaccagcaacaagctactcagacaac  
Dgri 2010 gagaacatagacacagagagtcggagaggcttgtaaatcacatataaataagcattaa

Dmel 2038 ~~~~~  
Dsim 2014 ~~~~~  
Dyak 1895 ~~~~~  
Dere 1870 ~~~~~  
Dpse 2040 ~~~~~  
Dper 2138 ~~~~~  
Dana 1760 ~~~~~  
Dvir 1517 CGTCTTGGTTT~~~~~CTTGGCTTGCATGTAGGCGGTTTCGGCCT  
Dmoj 1905 tctgtatctctatgg~~~~~cttggcttgcgctgtggcgttgaggcct  
Dgri 2070 agccaactcttcgacagtgctctcttgaatttggtgtatt~~~~~ggcgttgaggcat

Dmel 2038 ~~~~~aaa~tgccaagcggatgagtagacg  
Dsim 2014 ~~~~~aaa~tgccaagcggatgagtagacg  
Dyak 1895 ~~~~~aaa~tgccaagcggatgagtagacg  
Dere 1870 ~~~~~aaa~tgccaagcggatgagtagacg  
Dpse 2040 ~~~~~aaa~tgccaacagatgatttgga  
Dper 2138 ~~~~~aaa~tgccaacagatgatttgga  
Dana 1760 ~~~~~aaa~tgccaagcggatga~gtg~  
Dvir 1556 TTAAAATTATGCGAAAATTGACTGGCACAGATTAATAA~TGCCAATTAGATGAACGCCCT

Dmoj 1948 ttcgaattgtgcaaatatTTTTgagtgaggcaaacatgaaa~gagtcattgggaaaaagtgtg  
Dgri 2122 ttaagattgtgtaaaactcaagtggcatggattagaaaatgccaattagatgaaactttt

Dmel 2063 tactcg~~~~~gctgagccaggtgaaaaccctcgctaggtgacctttccgc  
Dsim 2039 tactcg~~~~~gtggagccaggtgaaaaccctcgccaggtgacctttctcgc  
Dyak 1920 tactcgt~~~aggtaatgagctgagccaggtgaaaaccgctcgtcaggtgacctttccgc  
Dere 1895 tacttgg~~~cagtaagagcttagccaggtgaaaaccgctcgcaggtgacctttccgc  
Dpse 2065 gctat~atagcagta~~catatctacatatgtatgatctaga~gaagatcttggg~a~t  
Dper 2163 gctat~atagcagta~~catatctacatatgtatgatctaga~gaagatcttggg~a~t  
Dana 1781 g~~atgat~~gagccgcca~at~tgg~a~g~atgatccaggtgaaaaccacggcaggt  
Dvir 1615 GGATACTTTTAGTAAG~~~~~GATTTGATTTAGTGAATTTTAACCGTTGATGCCAGCA  
Dmoj 2007 attaaatgtcatttattccaaatgatttcatttggctcatttcacttaataacaggctta  
Dgri 2182 ctctactgacattttgggcaatccacccatcgatattaggtgacggcatagttaacag

Dmel 2110 aggtaattc~~~~~cc~tgtgaaagcctc~~~~caaaaacc~attgcgagcc  
Dsim 2086 gggtaattc~~~~~cc~tgtgaaagcctc~~~~caaaaaccactgcgagcc  
Dyak 1977 tggtaattc~~~~~ca~tgtgaaagcctt~~~~cgaaaaca~actgagctgca  
Dere 1952 tcgtaattc~~~~~cc~tgtgaaagcctc~~~~caaacacc~actgtgtgca  
Dpse 2118 c~~~~~tt~cc~tgagaaagaagccagcaaaaaccccacaaagtgtt  
Dper 2216 gaaaataagcgt~~~~~atttcc~tgagaaagaagcttagcaaaaaccccacaaagtgtt  
Dana 1832 gacatttcgctttggcgatt~caatgtgaaagatcc~~tcaaaaaa~~~~~tg~t  
Dvir 1668 ACAGCTACTCCATCTATATAGTTAAATGTTTT~~~~~  
Dmoj 2067 gccatagcatcga~~~~~  
Dgri 2242 ctctctgttaaat~~~~~

Dmel 2152 cagaaatcttggcactgactctcctctgctga~~~~~  
Dsim 2129 cagaaatcttggcactgactctcctctgctga~~~~~  
Dyak 2019 aagaaatcttaacgctgattctcctctgctga~~~~~  
Dere 1994 aagaaatagggcgctggttctcttttggctga~~~~~  
Dpse 2159 agc~cag~t~~~~~ctctgctaaatgccaagaaaatggtttgacttgagat  
Dper 2270 agc~cag~t~~~~~ctctgctaaatgccaagaaaatggtttgacttgagat  
Dana 1879 acctcatgat~~~~~ctccgtaaatgccaagagaatgctgccacttggtc  
Dvir 1699 ~~~~~TTAGTAATGCTCTGCTAATTAAGG~~~~~  
Dmoj 2079 ~accatag~~~~~ttaacaagtctttgtaattaaga~~~~~  
Dgri 2254 ~gccaagaa~~~~~aatggcttgctaattaagg~~~~~

GRH

-----

Dmel 2183 ~~~~~ctaatttaatc~~~ataatztatagaacaagttgctgaatttt~gggtgt  
Dsim 2160 ~~~~~ctaatttaatc~~~ataatztatagaacaagttgctgagattt~gggtgt  
Dyak 2050 ~~~~~ctaatttaatc~~~ataatztatagaacaagttgctg~gattttgggtgt  
Dere 2025 ~~~~~ctaatttaatc~~~taagttatagaacaagttgc~gagattttgggtgt  
Dpse 2203 gccttg~~~~~ctaatttaattttataatztatagaacaagttgctcggttttt~gg~gt  
Dper 2314 gccttg~~~~~ctaatttaattttataatztatagaacaagttgctcggttttt~gg~gt  
Dana 1926 gccttggttagctaatttaattttataatztatagaacaagttgcttggtttttgggtgt  
Dvir 1723 ~~~~~TTTATAATTTATAGAACAACCTTGTTTTAAAGGTGTGTTT  
Dmoj 2110 ~~~~~ctttcaatztatagaacaacttgttttaaggcgtctgt  
Dgri 2281 ~~~~~tttatgatttatagaacaacttgttttaagggtgtgctt

Dmel 2230 gtt  
Dsim 2207 gtt  
Dyak 2097 gtg  
Dere 2071 gtt  
Dpse 2256 gtg  
Dper 2367 gtg  
Dana 1986 gtg  
Dvir 1763 GTG  
Dmoj 2150 gtg  
Dgri 2321 gtg

msn-WE2

Dmel 1 CCACTGC~~~~~CAACAGCAAGAA~~~~~ATCAGTGCCTTGCCATAAGACCGT



|      |     |                                                               |
|------|-----|---------------------------------------------------------------|
| Dere | 234 | tatcaataaaaacggaagtgccttaacaaaacgaacatgaaagcgaaagcaaaa~~~~~   |
| Dyak | 251 | tatcaataaagcggaagtgccttaacaaaacaaacacgaaagcgaaaatcaaatgaaa    |
| Dana | 187 | tatcaataaaaacggaagtgccttaacaaaacaaacatgaaagacgcgccaggcagc~~~  |
| Dper | 287 | TATCAATAAAAACGGAAGTGGAGAGAAGCAGAGGAGCACAGAGAGAGAGAGAGAGAGAGA  |
| Dpse | 278 | tatcaataaaaacggaagtggagagaagcagaggagcagagagagaga~~~~~         |
| Dvir | 197 | aaagcacagaacatacgagaaattagctgatatt~~gct~~~aataaagagagacatcac  |
| Dmoj | 289 | aaagcgcagaacatacgagaaattagttgataaatcgcatggaataaaaaaaaaatacac  |
| Dgri | 250 | aaagcacaacacatgagagaaattagttgataaatcacatgaaaagagacagatgaaggg  |
|      |     |                                                               |
| Dmel | 292 | CGGGCGAGACAGATAGT~CATAAATCAATGGAGCTTT~GCG~AAAAGATTTCGAGAAAACG |
| Dsim | 292 | CGGGGGAGACAGATAGT~CATAAATCAATGGAGCTTG~GCG~AAAAGATTCCCAGAAAACG |
| Dsec | 299 | cgggggagacagatagt~cataaatcaatggagcttt~gcg~aaaagattcccagaaaacg |
| Dere | 288 | cggg~cagacagatagt~cataaatcaatggagcttt~gcg~taaagattcccagaaaacg |
| Dyak | 311 | cgggggagacagatagt~cataaatcaatggagcttt~gca~aaaagattcccagaaaacg |
| Dana | 243 | ~~~~~cataaatcagaatatt~~~~~attcgcagaaaacg                      |
| Dper | 347 | AGGAAGGGATAGACAAAACATAAATTAAGTAAATAAAGCGCAAAGATTTCGGGAAAAA    |
| Dpse | 324 | aggaagggatagacaaaacataaattaaactaaataaagcgcaaaagattcgcggaaaaa  |
| Dvir | 252 | tg~taa~agaga~~~~~atgggtgtgagag~~~gtgggcggg~~~~~gcgggggggag    |
| Dmoj | 349 | tgctaatatagacacataaagagtgagagcagtggtgggatgagtgatcagggggagggg  |
| Dgri | 310 | a~~~~~agggggagtg                                              |
|      |     |                                                               |
| Dmel | 349 | AAATTAAGTCATGCTAAAGATCGTCAATTGACTGGAACTC~~~~~AAAAT            |
| Dsim | 349 | AAATTAAGTCATGCTAAAGATCGTCAATTGACTGGAAATC~~~~~CAAAT            |
| Dsec | 356 | aaattaagtcagctaaagatcgtcattgactggaaatc~~~~~caaat              |
| Dere | 344 | aaattaaatcatgctaaagatcgtcattgactggaaactcggatcgaatggtgttcgaaat |
| Dyak | 368 | aaattaagtcagctaaagatcgtcattgactggaaactcgcatcgaatgctgttcgaaat  |
| Dana | 273 | cattagagatcatcagatcagagactcgaag~~~~~                          |
| Dper | 407 | TGGCAGAATGGAATATCGTTT~GTCATTTAAGTGGAAATTCAAAACCTCAGGCCGAAATAA |
| Dpse | 384 | tggcagaatggaatcgttt~gtcatttaagtggaattccaaaactcaggtcgaataaa    |
| Dvir | 295 | tacaa~~~~~ctggcgcagatgcataaatcaaagtcgcatt~~~~~aagcgaagcgaaac  |
| Dmoj | 409 | tgtagggtattccagttcgc~tgcataaatcaaagtcatt~~~~~aagcgaagcgaaac   |
| Dgri | 322 | cact~~~~~cgc~tgcataaataaatgaaaatcgtattcagcgaagcgaatc          |
|      |     |                                                               |
| Dmel | 393 | ACCCAAAAAAGAAAAGAAAAAACAACCCCTGGCCAAATTGAAATTATGATTAAGGCAA    |
| Dsim | 393 | ACCCAAAAA~GAAAAA~~~~~CACCCAGGCCAAATTGAAATTATGATTAAGGCAA       |
| Dsec | 400 | acccaaaaaa~gaaaaaa~~~~~cacccaggccaaattgaaattatgattaaggcaa     |
| Dere | 404 | acccaaaaaa~gaaaaaa~~~~~cacccagaccaaaatgaaattatgattaag~~~~     |
| Dyak | 428 | acccaaaaaa~gaaaaaa~~~~~cacccagaccaaaatgaaattatgattaagc~ag     |
| Dana | 304 | acccaaacccaaaatcgagaaaaataaacagagccaggccggagcggagacac~~~~~    |
| Dper | 466 | AATT~~~~~CAAATAAAAATTATGATTAAGCCAG                            |
| Dpse | 443 | aatt~~~~~caaaataaaattatgattaagccag                            |
| Dvir | 344 | acgaatgaattcgtagaaatgtca~~~acagtgacgtcacaatttcagaagaaa~cacac  |
| Dmoj | 463 | ~~gaatgaattcgtagaaatgtcagtgacagtgacgtcacagtttcaacagaaaacagac  |
| Dgri | 367 | ~~atatgaattcgtagaaatgtcacaat~~gtgacgtcacaatcttctaatt~~~~~     |
|      |     |                                                               |
| Dmel | 453 | GCGGCAG~~~CAGGCCACCAATGGCAAAAATTGGTCAACAC~~~AATTCTGTGACGTTT   |
| Dsim | 444 | GCGG~~~~~CAGCGGGCCAAATGGCAAAAATTGGTCAACAC~ATTGGTCTGTGACGTTT   |
| Dsec | 451 | gcg~g~~~~~cagcaggccaaatgtcaaaaattgggtcaaac~attggctctgtgacgttt |
| Dere | 449 | ~~~~~cagcaggccaaatggcaaaaattgggtcaacacggc~~~tctgtgacgttt      |
| Dyak | 478 | gcagcagg~~cagcaggccaaatggcaaaaattgggtcaacacggc~~~tctgtgacgttt |
| Dana | 357 | ~~~~~caggccaggccaggttgcaaaaattggccagcagctg~~~~~tgacgttt       |
| Dper | 495 | AAAAAGACACACACAGACACACACACAG~~~~~CTGTGACGTTT                  |
| Dpse | 472 | aaaaagacacagacacacacacacaca~~g~~~~~ctgtgacgttt                |
| Dvir | 400 | accaaaaa~~~tgaattcaattaaaagctgttttaagaccgaaattccccacgctccgcca |
| Dmoj | 522 | cacagaaaactgaattaaattaaaagctgtttt~agacagaaattccccctgct~~~~~t  |
| Dgri | 415 | ~~~~~aattgacttaaaagcgttttaagcacaacaaattccccactcactgcat        |
|      |     |                                                               |
| Dmel | 507 | GATAAGCTGTTGGGGCCAAAAAGGTGACTCTCGCCCCGAATCGCGGCTCAATAG~~~~~   |
| Dsim | 497 | GATAAGCTGCTGGGGCCAAAAAGGTGGCTCT~~~~~                          |
| Dsec | 504 | gataagctgctggggccaaaaaggtggctct~~~~~                          |
| Dere | 497 | gataagctgctggggccaaaaaggtggctctcgtctcgaattgctggctcaataa~~~~~  |
| Dyak | 533 | gataagctgctggggccaaaaaggtggctctcgcctcgaattgctggctcaataaccaata |
| Dana | 403 | gataagctgctgaggccaaaaggtggctctaaagagcat~~~~~aatat~~~~~        |
| Dper | 536 | GATGGGCTTCGTAT~~~~~                                           |





GRH

-----  
Dmel 901 T~~AACAAGTTTCAAAAGAAGTGC GGGTACACAGCAAACAAAACCTTGC GCCAAATTTTAT  
Dsim 846 T~~AACAAGTTCTCAAAGAAGTGC GGGTACACAGTAAACAAAACCTTGTGGCTCATACAAT  
Dsec 841 t~~aacaagttctcaaagaactg cggatacacagtaaacaaaacttgtgcctcatacaat  
Dere 876 t~~aacaagttttcaaagaactg cgggtacacagtaaagaagatttgtgccttgtttaat  
Dyak 928 t~~aacaagttttcaaagaactg c gactacacagtaaacaaagatttg~gccttattcctt  
Dana 715 ~~~~~~  
Dper 872 T~~AACAAGTTTTCTTGAGCAGCCGCACAGTGGGCTGGCCTCCCATGGTTACCACGTGCC  
Dpse 866 t~~aacaagttttcttgagcagccgcacagtg gggctggcctcccatggttaccacgtgcc  
Dvir 945 ggaaacaagttgtcg~~~cacagtg ggc aagtggtcttatactgtgact~~~~~  
Dmoj 1030 agaaacaagttgtcg~~~cac cgtgggcaaagagatacttattctgtgtaactctatatac  
Dgri 1017 ~~~aacaagttgtcgtcgcacagtg ggc aagttg~~cttatgtattgta~tgtatgtat

GRH

-----  
Dmel 959 ATTCGATTCAAAGAAATATTCTTAATATTTTA~~~~~TTTATTTCATGGCAACTTGTT  
Dsim 904 TTTTCGAT~~~~TATTATAATTATTATATTTGA~~~~~TTGGTTTCATGGCAACTTTTT  
Dsec 899 tttc gat~~~~tattattattattatatttga~~~~~ttggttcatggcaacttttt  
Dere 934 tttccatacgcagaaaaatacatttcaatgg tattgattggttgttcacggacacatttt  
Dyak 985 tttaaattcgcag gaaaataca~~~~~ttcttatgggtatcaatttatagattgta  
Dana 715 ~~~~~~  
Dper 930 ACTTGCCACTTGCCACAGAGCAGAGCCCTAGATCGGGGCAGAGACTGGTACCTGGTACCT  
Dpse 924 acttgccacttgccacagagcagagccctagat cggggcagagactgggtgcctggtaact  
Dvir 993 ~~~~~~tacatataattgtaatcgcat t gtt~~~~~  
Dmoj 1087 atacataatttgcatacacacataatataatgaat atgtatattgtaatcgcat t gttggtg~  
Dgri 1073 atataatatttatataatataatataatataatgtatttcaattgcatta~~~~~ttggtggtg

Dmel 1011 CAAAAGTGTTTTACAATATAATCTGCAAAACCTTAACCACTTCAGTTGTGTGGGAGGTTTT  
Dsim 952 CCCAAGTGTCTTACATTTTGTCTGCGTAACCCTAACAACCTTCAGTTGTGTGGGAGATTT  
Dsec 947 cccaagtgcttacat ttttaactctgcgtaaccctaacaacttcagttgtgtgggagattt  
Dere 994 gccaagtg ttttacgatttgatctgcggaaccctaaccacttcagttgtgtgggagattt  
Dyak 1036 tctgattgg tttatgag~~~atctgcgaaaccctaacaacttgagttgtgtgggagatta  
Dana 715 ~~~~~~  
Dper 990 GGCACCTGGTACCTGTAGGCCTGTGTGGAGTGTGGAGTGTGGGTGCGAAAAACCCATTGA  
Dpse 984 g~~~~~taggcctgtggagtgtgggtcgcaaaaaccattga  
Dvir 1017 ~~~~~~accacgtgccacttg cagcttgcggtgtaaa~~caccac  
Dmoj 1145 ~~~~~~ttg taccacgtgccacttg cagcttagcgtggtgtaaa~~caccac  
Dgri 1128 tgcttaagttat tttttttg t taccacgtgccacttg cagcttagcgtggtgtaaaccaaac

Dmel 1071 CAATTGACTGGCATTCTTTGGCAAAATTGTAGGCCATAAAGATATGAAATTGCAGAGAC  
Dsim 1012 CAGTTGACTGGCATTCTTTGGCCATATTTTGGGCCATAAAGATATGAAATTGCAGAGAC  
Dsec 1007 caattgactggcatttctttggccatattttgagccataaagat atgaaatttcagagac  
Dere 1054 caattgagtg g catttctttggcaaaatttcaggccataaacat atgaaattacagagat  
Dyak 1093 caattgactggcatttctttgggcaaaacttcgaggccataaacat atgaaattacagagat  
Dana 715 ~~~~tgactggcagctctagccc~~~~~  
Dper 1050 AAGACCTATGAAATTTAATAGATTTTCATGAAAGTATCCATCGGATT~~~~~  
Dpse 1021 aagacctatgaaattta atagatttcatgaaagtatccatcggatt~~~~~  
Dvir 1055 aaatgaggtcgtcggcg t t atgaagcaggaggcgtgtagacgtgggctga~~~~~  
Dmoj 1188 aaatgaggtcgccgcta~~~~~aggaggcgtgtagacgtgggcccagaaaaaaa  
Dgri 1188 aaatgaggtcgtcagtg t tccgaaggagactcaac~~agacgtgggcccgtcaat atgact

Dmel 1131 TTTT~GAAAGCTGCCAATGCCAACTGATTGACAGCAGGATCCTT  
Dsim 1072 TTTT~GAAAGCTGCCAATGCCAACTGATTGACAGCAGAATTTG  
Dsec 1067 tttt~gaaagctgccaatgccaactgattgacagcagaatttcg  
Dere 1114 tttt~gaaagctgccaatgccaatgattgacagcagaatttcg  
Dyak 1153 ttttcgaaagctgccaatgccaactgattgacagctgaatttcg  
Dana 734 ~~~~~~gattgacagcgc  
Dper 1095 ~~~~~~GGATTGACAG  
Dpse 1066 ~~~~~~ggattgacag  
Dvir 1104 ~~~~~~ctttttg cgtattggccgcat t tctaagccgtt  
Dmoj 1239 tctacttttttttttttgcaaaactggccgcatttcttagccgaa

Dgri 1246 ata~~~~tttttttagcgaattggccgatttctaagccgaa
